# Supplementary material for: Ab initioprediction of key parameters and magneto-structural correlation of tetracoordinated lanthanide single-ion magnets
Source: Royal Society of Chemistry journal article supplement (doi:10.1039/d3cp01766d), 2023-01-01
Supplement: d3cp01766d1.pdf [file d3cp01766d1.pdf]

*Ab initio* prediction of key parameters and magneto-structural correlation of tetracoordinated lanthanide singleion magnet.

Qi-Qi Yang<sup>#a</sup> Yu-Fei Wang<sup>#a</sup> Yu-Xi Wang<sup>a</sup> Ming-Jing Tang<sup>a</sup> and Bing Yin<sup>\*a</sup>

Lab of Theoretical Molecular Magnetism (LTMM), College of Chemistry and Materials Science, Northwest University, Xi'an, 710127 P. R. China. [rayinyin@nwu.edu.cn](mailto:rayinyin@nwu.edu.cn)

Table S1 *ab initio* results of DUXGUB

| DUXGUB          |           | E (K) | $g_x$  | $g_y$  | $g_z$   | $\theta$ (°) | wave functions                                        |
|-----------------|-----------|-------|--------|--------|---------|--------------|-------------------------------------------------------|
| KD <sub>0</sub> | this work | 0     | 0.0001 | 0.0002 | 19.9921 | 0            | 99.96% $ \pm 15/2\rangle$                             |
|                 | Ref       | 0     | 0.0001 | 0.0001 | 19.8830 |              |                                                       |
| KD <sub>1</sub> | this work | 487   | 0.0091 | 0.0100 | 17.1396 | 0.2          | 99.89% $ \pm 13/2\rangle$                             |
|                 | Ref       | 485   | 0.0106 | 0.0094 | 17.0716 |              |                                                       |
| KD <sub>2</sub> | this work | 969   | 0.0096 | 0.0108 | 14.2757 | 0.9          | 98.99% $ \pm 11/2\rangle$                             |
|                 | Ref       | 954   | 0.0365 | 0.0279 | 14.2201 |              |                                                       |
| KD <sub>3</sub> | this work | 1337  | 1.1384 | 1.4331 | 11.2571 | 3.7          | 94.01% $ \pm 9/2\rangle$                              |
|                 | Ref       | 1304  | 1.6501 | 1.3082 | 11.1331 |              |                                                       |
| KD <sub>4</sub> | this work | 1479  | 0.1910 | 0.3524 | 19.2834 | 88.7         | 51.55% $ \pm 1/2\rangle$<br>+33.54% $ \pm 3/2\rangle$ |
|                 | Ref       | 1479  | 2.4631 | 3.5013 | 12.3088 |              |                                                       |
| KD <sub>5</sub> | this work | 1534  | 5.6322 | 6.4175 | 7.7325  | 80.7         | 72.04% $ \pm 7/2\rangle$                              |
|                 | Ref       | 1512  | 0.9453 | 3.7841 | 10.8352 |              |                                                       |
| KD <sub>6</sub> | this work | 1624  | 0.9388 | 2.1746 | 15.4244 | 89.2         | 44.56% $ \pm 5/2\rangle$<br>+27.38% $ \pm 3/2\rangle$ |
|                 |           |       |        |        |         |              |                                                       |

|                 |           |      |        |        |         |      |                                                |
|-----------------|-----------|------|--------|--------|---------|------|------------------------------------------------|
|                 | Ref       | 1567 | 1.9997 | 6.1477 | 12.1487 |      |                                                |
| KD <sub>7</sub> | this work | 1733 | 0.3624 | 0.6479 | 18.9808 | 88.2 | 30.77% ±3/2><br>+30.67% ±1/2><br>+27.43% ±5/2> |
|                 | Ref       | 1688 | 0.3807 | 0.2456 | 18.7140 |      |                                                |

Ref—*Inorg. Chem. Front.*, 2020, 7, 4805–4812

Table S2 *ab initio* results of ABIKUV

| ABIKUV          |           | E (K) | g <sub>x</sub> | g <sub>y</sub> | g <sub>z</sub> | θ (°) | wave functions              |
|-----------------|-----------|-------|----------------|----------------|----------------|-------|-----------------------------|
| KD <sub>0</sub> | this work | 0     | 0.0006         | 0.0007         | 19.8409        | 0     | 97.5% ±15/2>                |
|                 | Ref       | 0     | 0.00           | 0.00           | 19.72          | 0     | 97% ±15/2>                  |
| KD <sub>1</sub> | this work | 299   | 0.0118         | 0.0157         | 16.8121        | 7.2   | 90.1% ±13/2>                |
|                 | Ref       | 288   | 0.01           | 0.01           | 16.74          | 6.7   | 90% ±13/2>                  |
| KD <sub>2</sub> | this work | 541   | 0.0423         | 0.0603         | 13.8981        | 10.0  | 77.1% ±11/2>                |
|                 | Ref       | 526   | 0.05           | 0.07           | 13.92          | 9.5   | 78% ±11/2>                  |
| KD <sub>3</sub> | this work | 754   | 0.9583         | 1.0635         | 11.2031        | 13.0  | 61.5% ±9/2>                 |
|                 | Ref       | 736   | 0.66           | 0.77           | 11.39          | 14.3  | 64% ±9/2>                   |
| KD <sub>4</sub> | this work | 927   | 2.3959         | 3.5276         | 8.6282         | 26.2  | 44.6% ±7/2><br>+23.7% ±5/2> |
|                 | Ref       | 906   | 1.27           | 2.24           | 9.19           | 26.0  | 47% ±7/2><br>+28% ±5/2>     |

|                 |           |      |        |        |         |      |                                           |
|-----------------|-----------|------|--------|--------|---------|------|-------------------------------------------|
| KD <sub>5</sub> | this work | 1052 | 3.0744 | 4.2161 | 9.2166  | 74.4 | 42.5% ±3/2><br>+26.7% ±5/2>               |
|                 | Ref       | 1030 | 1.35   | 4.91   | 7.03    | 45.2 | 52% ±3/2><br>+26% ±5/2>                   |
| KD <sub>6</sub> | this work | 1134 | 1.3473 | 3.7139 | 14.7986 | 89.3 | 59.8% ±1/2>                               |
|                 | Ref       | 1103 | 2.01   | 6.98   | 12.46   | 88.3 | 67% ±1/2>                                 |
| KD <sub>7</sub> | this work | 1330 | 0.0489 | 0.0988 | 19.6975 | 74.2 | 28% ±3/2><br>+25.6% ±5/2><br>+21.3% ±1/2> |
|                 | Ref       | 1281 | 0.09   | 0.18   | 19.57   | 74.4 | 29% ±3/2><br>+26% ±5/2><br>+21% ±1/2>     |

Ref—*Chem. Commun.*, 2021,57, 9208-9211

Table S3 *ab initio* results of JEYRAK

| JEYRAK          |           | E (K) | g <sub>x</sub> | g <sub>y</sub> | g <sub>z</sub> | θ (°) | wave functions |
|-----------------|-----------|-------|----------------|----------------|----------------|-------|----------------|
| KD <sub>0</sub> | this work | 0     | 0.0017         | 0.0023         | 19.9646        | 0     | 99.6% ±15/2>   |
|                 | Ref       | 0     | 0.002          | 0.002          | 19.817         |       | 99.6% ±15/2>   |
| KD <sub>1</sub> | this work | 347   | 0.0547         | 0.0754         | 17.1035        | 9.4   | 93.6% ±13/2>   |

|                 |           |      |        |        |         |      |                                             |
|-----------------|-----------|------|--------|--------|---------|------|---------------------------------------------|
|                 | Ref       | 338  | 0.043  | 0.058  | 17.021  |      | 93.4% ±13/2>                                |
| KD <sub>2</sub> | this work | 533  | 1.7251 | 3.1800 | 14.3892 | 57.2 | 36.4% ±11/2><br>+16.9% ±7/2>                |
|                 | Ref       | 521  | 1.459  | 2.620  | 14.296  |      | 38.9% ±11/2><br>+16.1% ±7/2>                |
| KD <sub>3</sub> | this work | 610  | 1.0976 | 4.6792 | 9.1213  | 58.1 | 43.8% ±11/2><br>+18.4% ±1/2>                |
|                 | Ref       | 598  | 1.370  | 4.229  | 9.634   |      |                                             |
| KD <sub>4</sub> | this work | 734  | 4.3266 | 5.0258 | 9.2448  | 84.9 | 46.6% ±9/2><br>+17% ±3/2>                   |
|                 | Ref       | 716  | 4.527  | 5.165  | 8.900   |      |                                             |
| KD <sub>5</sub> | this work | 881  | 0.7098 | 0.9973 | 14.1518 | 86.6 | 36.7% ±7/2><br>+24.2% ±9/2><br>+18.3% ±1/2> |
|                 | Ref       | 852  | 0.810  | 1.163  | 13.987  |      |                                             |
| KD <sub>6</sub> | this work | 1079 | 0.0377 | 0.0629 | 17.4555 | 88.2 | 34.9% ±5/2><br>+25.5% ±3/2><br>+23.5% ±7/2> |
|                 | Ref       | 1043 | 0.034  | 0.059  | 17.296  |      |                                             |
| KD <sub>7</sub> | this work | 1467 | 0.0010 | 0.0012 | 19.9473 | 87.1 | 41.5% ±1/2><br>+31.3% ±3/2><br>+17.5% ±5/2> |
|                 | Ref       | 1424 | 0.001  | 0.001  | 19.838  |      |                                             |

Ref—*Inorg. Chem. Front.*, **2023**,10, 485-492

Table S4 *ab initio* results of ABILEG

| ABILEG          |           | E (K) | $g_x$  | $g_y$  | $g_z$   | $\theta$ (°) | wave functions                              |
|-----------------|-----------|-------|--------|--------|---------|--------------|---------------------------------------------|
| KD <sub>0</sub> | this work | 0     | 0.0050 | 0.0077 | 19.8518 | 0            | 97.8% ±15/2>                                |
|                 | Ref       | 0     | 0.01   | 0.01   | 19.74   | 0            | 97% ±15/2>                                  |
| KD <sub>1</sub> | this work | 267   | 0.3641 | 0.7089 | 16.4251 | 2.2          | 89.2% ±13/2>                                |
|                 | Ref       | 257   | 0.38   | 0.75   | 16.32   | 1.4          | 30% ±13/2>                                  |
| KD <sub>2</sub> | this work | 406   | 3.2029 | 4.6900 | 13.3386 | 80.6         | 26.7% ±11/2><br>+21.1% ±3/2>                |
|                 | Ref       | 394   | 3.19   | 4.70   | 13.06   | 77.4         | 27% ±11/2><br>+20% ±3/2>                    |
| KD <sub>3</sub> | this work | 501   | 0.7831 | 5.0024 | 7.6665  | 81.3         | 48.6% ±11/2>                                |
|                 | Ref       | 490   | 0.86   | 4.92   | 7.63    | 81.9         | 46% ±11/2>                                  |
| KD <sub>4</sub> | this work | 638   | 2.4552 | 2.8252 | 11.2593 | 82.3         | 43.3% ±9/2>                                 |
|                 | Ref       | 628   | 2.41   | 2.70   | 11.23   | 82.7         | 34% ±9/2>                                   |
| KD <sub>5</sub> | this work | 777   | 0.0604 | 0.1695 | 14.7117 | 85.8         | 36.6% ±7/2><br>+25.8% ±9/2>                 |
|                 | Ref       | 770   | 0.02   | 0.17   | 14.59   | 86.4         | 32% ±7/2>                                   |
| KD <sub>6</sub> | this work | 913   | 0.1681 | 0.1903 | 17.6305 | 82.2         | 32.9% ±5/2><br>+25.1% ±7/2><br>+22.6% ±3/2> |
|                 | Ref       | 912   | 0.14   | 0.16   | 17.34   | 83.0         | 25% ±5/2>                                   |
| KD <sub>7</sub> | this work | 1042  | 0.0194 | 0.0381 | 19.6720 | 88.3         | 45.5% ±1/2><br>+33.3% ±3/2>                 |

|     |      |      |      |       |      |           |
|-----|------|------|------|-------|------|-----------|
| Ref | 1041 | 0.02 | 0.03 | 19.56 | 87.0 | 23% ±1/2> |
|-----|------|------|------|-------|------|-----------|

Ref—*Chem. Commun.*, **2021**,57, 9208-9211

Table S5 *ab initio* results of ZOTSAE01

| ZOTSAE01        |           | E (K) | $g_x$  | $g_y$  | $g_z$   | $\theta$ (°) | wave functions                                 |
|-----------------|-----------|-------|--------|--------|---------|--------------|------------------------------------------------|
| KD <sub>0</sub> | this work | 0     | 0.1938 | 0.7053 | 17.5942 | 0            | 64.1% ±15/2><br>+28.7%  ±11/2>                 |
|                 | Ref       | 0     |        |        |         |              | 69.8% ±15/2><br>+30.1% ±7/2>                   |
| KD <sub>1</sub> | this work | 107   | 0.0698 | 0.5404 | 14.9352 | 2.0          | 64.6% ±13/2><br>+28.6%  ±9/2>                  |
|                 | Ref       | 35    |        |        |         |              | 69.6% ±7/2><br>+30.1% ±15/2>                   |
| KD <sub>2</sub> | this work | 391   | 2.2315 | 2.5447 | 13.2084 | 1.7          | 31.4% ±15/2><br>+30.2%  ±11/2><br>+26.2% ±7/2> |
|                 | Ref       | 50    |        |        |         |              | 95.7% ±5/2><br>+4.0% ±3/2>                     |
| KD <sub>3</sub> | this work | 578   | 3.3415 | 6.0572 | 8.2534  | 8.7          | 27.9% ±5/2><br>+26.4%  ±13/2><br>+22.9% ±9/2>  |
|                 |           |       |        |        |         |              |                                                |

|                 |           |      |        |        |         |      |                                             |
|-----------------|-----------|------|--------|--------|---------|------|---------------------------------------------|
|                 | Ref       | 105  |        |        |         |      | 100% ±9/2>                                  |
| KD <sub>4</sub> | this work | 770  | 3.1099 | 3.6711 | 10.5989 | 88.7 | 27.8% ±3/2><br>+24.5% ±11/2>                |
|                 | Ref       | 140  |        |        |         |      | 95.4% ±3/2>                                 |
| KD <sub>5</sub> | this work | 987  | 0.7563 | 0.8859 | 14.3308 | 87.2 | 25.6% ±7/2><br>+23.9% ±1/2><br>+22.9% ±9/2> |
|                 | Ref       | 201  |        |        |         |      | 99.6% ±1/2>                                 |
| KD <sub>6</sub> | this work | 1303 | 0.0675 | 0.0967 | 17.2856 | 88.2 | 33.7% ±5/2><br>+27.7% ±3/2><br>+22% ±7/2>   |
|                 | Ref       | 281  |        |        |         |      | 99.4% ±11/2>                                |
| KD <sub>7</sub> | this work | 1920 | 0.0014 | 0.0022 | 19.9090 | 89.6 | 45.7% ±1/2><br>+31.7% ±3/2>                 |
|                 | Ref       | 387  |        |        |         |      | 99.7% ±13/2>                                |

Ref—*Inorg. Chem. Front.*, **2016**, 3, 1028-1034

Table S6 *ab initio* results of ANOVUW

| ANOVUW          |           | E (K) | g <sub>x</sub> | g <sub>y</sub> | g <sub>z</sub> | θ (°) | wave functions |
|-----------------|-----------|-------|----------------|----------------|----------------|-------|----------------|
| KD <sub>0</sub> | this work | 0     | 0.0104         | 0.0198         | 19.7995        | 0     | 97.6% ±15/2>   |
|                 | Ref       | 0     |                |                |                |       | 92.0% ±15/2>   |
| KD <sub>1</sub> | this work | 173   | 0.2827         | 0.3824         | 16.6781        | 18.6  | 79.2% ±13/2>   |

|                 |           |      |        |        |         |      |                                             |
|-----------------|-----------|------|--------|--------|---------|------|---------------------------------------------|
|                 | Ref       | 86   |        |        |         |      | 97.1% ±13/2>                                |
| KD <sub>2</sub> | this work | 281  | 2.5426 | 3.9501 | 13.6424 | 74.8 | 26.4% ±1/2><br>+26.9% ±3/2>                 |
|                 | Ref       | 230  |        |        |         |      | 80.3% ±11/2>                                |
| KD <sub>3</sub> | this work | 371  | 0.3301 | 5.3080 | 7.8416  | 25.4 | 38.5% ±11/2>                                |
|                 | Ref       | 314  |        |        |         |      | 47.4% ±9/2><br>+47.3% ±3/2>                 |
| KD <sub>4</sub> | this work | 471  | 3.3375 | 3.6119 | 13.9040 | 57.6 | 37.3% ±7/2>                                 |
|                 | Ref       | 332  |        |        |         |      | 47.9% ±1/2><br>+36.7% ±7/2>                 |
| KD <sub>5</sub> | this work | 573  | 0.3228 | 0.5972 | 13.6596 | 73.7 | 27.8% ±9/2><br>+24% ±5/2>                   |
|                 | Ref       | 399  |        |        |         |      | 69.5% ±5/2>                                 |
| KD <sub>6</sub> | this work | 815  | 0.2941 | 0.3341 | 16.3397 | 74.1 | 26.7% ±7/2><br>+20.9% ±9/2>                 |
|                 | Ref       | 520  |        |        |         |      | 52.5% ±3/2><br>+44.8% ±9/2>                 |
| KD <sub>7</sub> | this work | 1037 | 0.0533 | 0.1306 | 19.2225 | 81.0 | 28% ±3/2><br>+31% ±1/2><br>+21.8% ±5/2>     |
|                 | Ref       | 592  |        |        |         |      | 41.2% ±7/2><br>+30.3% ±1/2><br>+27.2% ±5/2> |

Ref—*Inorg. Chem. Front.*, **2016**, 3, 1028-1034



Table S7 *ab initio* results of LAJKAL

| LAJKAL          |           | E (K) | $g_x$  | $g_y$  | $g_z$   | $\theta$ (°) | wave functions |
|-----------------|-----------|-------|--------|--------|---------|--------------|----------------|
| KD <sub>0</sub> | this work | 0     | 0.0127 | 0.0172 | 17.8478 | 0            | 98.4% ±15/2>   |
|                 | Ref       | 0     | 0.004  | 0.005  | 17.858  |              |                |
| KD <sub>1</sub> | this work | 72    | 0.2044 | 0.2189 | 15.5239 | 3.1          | 99.1% ±13/2>   |
|                 | Ref       | 72    |        |        |         |              |                |
| KD <sub>2</sub> | this work | 141   | 0.0620 | 0.3320 | 12.9213 | 1.9          | 96.2% ±11/2>   |
|                 | Ref       | 144   |        |        |         |              |                |
| KD <sub>3</sub> | this work | 221   | 0.7540 | 0.9595 | 10.1895 | 1.7          | 90% ±9/2>      |
|                 | Ref       | 229   |        |        |         |              |                |
| KD <sub>4</sub> | this work | 298   | 5.3823 | 5.9678 | 6.9359  | 84.0         | 77.9% ±7/2>    |
|                 | Ref       | 314   |        |        |         |              |                |
| KD <sub>5</sub> | this work | 441   | 3.5998 | 5.6360 | 6.6467  | 84.5         | 77.5% ±5/2>    |
|                 | Ref       | 447   |        |        |         |              |                |
| KD <sub>6</sub> | this work | 516   | 2.5123 | 4.4345 | 5.5500  | 62.3         | 86.1% ±3/2>    |
|                 | Ref       | 524   |        |        |         |              |                |
| KD <sub>7</sub> | this work | 574   | 0.8142 | 4.3631 | 13.9312 | 88.6         | 79.2% ±1/2>    |
|                 | Ref       | 584   |        |        |         |              |                |

Table S8 *ab initio* results of FOXWUM

| FOXWUM          |           | E (K) | $g_x$  | $g_y$  | $g_z$   | $\theta$ ( $^\circ$ ) | wave functions      |
|-----------------|-----------|-------|--------|--------|---------|-----------------------|---------------------|
| KD <sub>0</sub> | this work | 0     | 0.0223 | 0.0286 | 17.8104 | 0                     | 98%  $\pm 15/2$ >   |
|                 | Ref       |       |        |        |         |                       |                     |
| KD <sub>1</sub> | this work | 51    | 0.2607 | 0.2938 | 15.5137 | 5.9                   | 97.2%  $\pm 13/2$ > |
|                 | Ref       |       |        |        |         |                       |                     |
| KD <sub>2</sub> | this work | 106   | 0.1945 | 0.3328 | 12.8584 | 5.6                   | 90.7%  $\pm 11/2$ > |
|                 | Ref       |       |        |        |         |                       |                     |
| KD <sub>3</sub> | this work | 176   | 0.9088 | 1.0302 | 10.1236 | 5.4                   | 80%  $\pm 9/2$ >    |
|                 | Ref       |       |        |        |         |                       |                     |
| KD <sub>4</sub> | this work | 243   | 5.3938 | 5.8273 | 7.3924  | 89.1                  | 65.7%  $\pm 7/2$ >  |
|                 | Ref       |       |        |        |         |                       |                     |

|                 |           |     |        |        |         |      |             |
|-----------------|-----------|-----|--------|--------|---------|------|-------------|
|                 |           | Ref |        |        |         |      |             |
| KD <sub>5</sub> | this work | 382 | 3.3741 | 6.3794 | 6.5394  | 85.7 | 64.5% ±5/2> |
|                 |           | Ref |        |        |         |      |             |
| KD <sub>6</sub> | this work | 450 | 2.4069 | 3.7692 | 5.1360  | 58.4 | 71% ±3/2>   |
|                 |           | Ref |        |        |         |      |             |
| KD <sub>7</sub> | this work | 501 | 0.8857 | 5.1305 | 13.3313 | 86.9 | 69% ±1/2>   |
|                 |           | Ref |        |        |         |      |             |

Ref—*Angew. Chem. Int. Ed.* **2015**, *54*, 5864 -5868

Table S9 *ab initio* results of LAJJUE

| LAJJUE          |      | E (K) | g <sub>x</sub> | g <sub>y</sub> | g <sub>z</sub> | θ (°) | wave functions |
|-----------------|------|-------|----------------|----------------|----------------|-------|----------------|
| KD <sub>0</sub> | this | 0     | 0.7026         | 2.7052         | 17.2934        | 0     | 71% ±15/2>     |

|                 |           |      |        |        |         |      |                               |
|-----------------|-----------|------|--------|--------|---------|------|-------------------------------|
|                 | work      |      |        |        |         |      |                               |
|                 | Ref       | 0    |        |        |         |      |                               |
| KD <sub>1</sub> | this work | 90   | 3.2350 | 5.5243 | 8.7894  | 3.2  | 36.3% ±13/2><br>+24.8%  ±9/2> |
|                 | Ref       | 98   |        |        |         |      |                               |
| KD <sub>2</sub> | this work | 213  | 0.6303 | 4.0542 | 6.5376  | 89.4 | 26.7% ±13/2>                  |
|                 | Ref       | 219  |        |        |         |      |                               |
| KD <sub>3</sub> | this work | 403  | 1.4654 | 1.6861 | 9.4520  | 90.0 | 27.4% ±11/2>                  |
|                 | Ref       | 406  |        |        |         |      |                               |
| KD <sub>4</sub> | this work | 651  | 0.1516 | 0.1767 | 12.2213 | 89.8 | 26.5% ±11/2><br>+23.5%  ±9/2> |
|                 | Ref       | 650  |        |        |         |      |                               |
| KD <sub>5</sub> | this work | 944  | 0.0097 | 0.0275 | 14.7284 | 89.6 | 28.5% ±9/2><br>+25.2%  ±7/2>  |
|                 | Ref       | 935  |        |        |         |      |                               |
| KD <sub>6</sub> | this work | 1219 | 0.0101 | 0.0109 | 17.2744 | 89.2 | 31.5% ±5/2><br>+27.2% ±7/2>   |
|                 | Ref       | 1201 |        |        |         |      |                               |
| KD <sub>7</sub> | this work | 1402 | 0.0007 | 0.0009 | 19.8781 | 89.0 | 39.1% ±1/2><br>+31% ±3/2>     |
|                 | Ref       | 1371 |        |        |         |      |                               |

Ref—*Inorg. Chem.* **2016**, *55*, 1905-1911

Table S10 The experimental values and theoretical predictions of  $\tau_{QTM}$  (in s) and  $U_{eff}$  (in K) of the systems studied here.

|          | $\tau_{QTM}^{exp\ a}$ | $\tau_{QTM}^{Zee\ b}$<br>20 mT | $\tau_{QTM}^{Zee\ c}$<br>Ref | $\tau_{QTM}^{Zee\ d}$<br>aniso | $U_{eff}^{exp\ e}$ | $U_{eff}^{Zee\ f}$ | $U_{eff}^{Zee\ g}$<br>Ref |
|----------|-----------------------|--------------------------------|------------------------------|--------------------------------|--------------------|--------------------|---------------------------|
| DUXGUB   | $3.70 \times 10^{-1}$ | 2.95                           | 7.10                         |                                | 1278               | 1522/348           | 1500/468                  |
| ABIKUV   | $1.75 \times 10^{-1}$ | $1.67 \times 10^{-1}$          | $1.41 \times 10^{-1}$        |                                | 916±126            | 986/649            | 1031/593                  |
| JEYRAK   |                       | $1.74 \times 10^{-2}$          | $1.77 \times 10^{-2}$        |                                | 593                | 650/536            | 650/531                   |
| ABILEG   | $4.90 \times 10^{-2}$ | $1.68 \times 10^{-3}$          | $1.14 \times 10^{-3}$        |                                |                    | 470/411            | 457/397                   |
| LAJKAL   | $1.08 \times 10^{-2}$ |                                | $3.11 \times 10^{-3}$        |                                | 71                 | 378/11             |                           |
| FOXWUM   | $6.74 \times 10^{-3}$ | $1.01 \times 10^{-4}$          |                              |                                | 66                 | 325/30             |                           |
| ANOVUV   | $1.81 \times 10^{-2}$ | $2.83 \times 10^{-4}$          |                              | $1.03 \times 10^{-3}$          | 36                 | 360/~0             |                           |
| ZOTSAE01 | $2.89 \times 10^{-2}$ | $2.35 \times 10^{-7}$          |                              | $1.89 \times 10^{-6}$          | 25                 | 545/~0             |                           |
| LAJJUE   | $5.53 \times 10^{-2}$ | $1.58 \times 10^{-8}$          | $2.67 \times 10^{-8}$        | $8.40 \times 10^{-8}$          | 17                 | 120/~0             |                           |

<sup>a</sup>  $\tau_{QTM}$  fitted from experimental data. <sup>b</sup>  $\tau_{QTM}$  calculated from eqn 1b using results calculated here and 20 mT  $B_{ave}$ . <sup>c</sup>  $\tau_{QTM}$  calculated from eqn 1b using results reported in references. <sup>d</sup>  $\tau_{QTM}$  calculated from eqn 1c. <sup>e</sup>  $U_{eff}$  fitted from experimental data. <sup>f</sup>  $U_{eff}$  calculated from eqn 3a using results calculated here. <sup>g</sup>  $U_{eff}$  calculated from eqn 3a using results reported in references. <sup>h</sup> result using 300 K in eqn 3a is at the left side of “/”, result using  $T_{AC}$  in eqn 3a is at the right side of “/”.

Table S11 Various  $U_{\text{eff}}^{\text{KD}}$  values according to transition magnetic moment  $|\mu|$ , angle of easy axis of excited KD with respect to that of ground KD ( $\theta$ ) and crystal field wave function composition.

|          | $U_{\text{eff}}^{\text{Zee}}$ (K) |                 | $U_{\text{eff}}^{\text{KD}}$ by $ \mu $ for QTM and TA-QTM |          |                                  | $U_{\text{eff}}^{\text{KD}}$ by $ \mu $ for spin-phonon transition |         |                                  |
|----------|-----------------------------------|-----------------|------------------------------------------------------------|----------|----------------------------------|--------------------------------------------------------------------|---------|----------------------------------|
|          | 300 K                             | $T_{\text{AC}}$ | KD                                                         | $ \mu $  | $U_{\text{eff}}^{\text{KD}}$ (K) | KD                                                                 | $ \mu $ | $U_{\text{eff}}^{\text{KD}}$ (K) |
| DUXGUB   | 1500                              | 468             | KD <sub>3</sub>                                            | 4.40E-01 | 1337                             | KD <sub>4</sub>                                                    | 0.47    | 1479                             |
| ABIKUV   | 986                               | 649             | KD <sub>2</sub>                                            | 1.80E-02 | 541                              | KD <sub>4</sub>                                                    | 0.58    | 927                              |
| JEYRAK   | 650                               | 536             | KD <sub>1</sub>                                            | 2.40E-02 | 347                              | KD <sub>2</sub>                                                    | 0.38    | 533                              |
| ABILEG   | 470                               | 411             | KD <sub>1</sub>                                            | 1.80E-01 | 267                              | KD <sub>2</sub>                                                    | 1.80    | 406                              |
| ZOTSAE01 | 545                               | 0               | KD <sub>0</sub>                                            | 1.50E-01 | 0                                | KD <sub>1</sub>                                                    | 0.18    | 107                              |
| ANOVUW   | 360                               | 0               | KD <sub>1</sub>                                            | 1.30E-01 | 173                              | KD <sub>2</sub>                                                    | 0.67    | 281                              |
| LAJKAL   | 378                               | 11              | KD <sub>1</sub>                                            | 7.20E-02 | 72                               | KD <sub>3</sub>                                                    | 0.11    | 221                              |
| LAJJUE   | 120                               | 0               | KD <sub>0</sub>                                            | 5.70E-01 | 0                                | KD <sub>1</sub>                                                    | 0.84    | 90                               |
| FOXWUM   | 325                               | 30              | KD <sub>1</sub>                                            | 9.70E-02 | 51                               | KD <sub>2</sub>                                                    | 0.11    | 106                              |

|          | $U_{\text{eff}}^{\text{KD}}$ by $\theta$ |              |       | $U_{\text{eff}}^{\text{KD}}$ by crystal field wave function composition |                                                   |       |
|----------|------------------------------------------|--------------|-------|-------------------------------------------------------------------------|---------------------------------------------------|-------|
|          | KD                                       | $\theta$ (°) | E (K) | KD                                                                      | composition                                       | E (K) |
| DUXGUB   | KD <sub>4</sub>                          | 88.7         | 1479  | KD <sub>4</sub>                                                         | 51.6% $ \pm 1/2\rangle + 33.5\% \pm 3/2\rangle$   | 1479  |
| ABIKUV   | KD <sub>3</sub>                          | 13.0         | 754   | KD <sub>4</sub>                                                         | 44.6% $ \pm 7/2\rangle + 23.7\% \pm 5/2\rangle$   | 927   |
| JEYRAK   | KD <sub>2</sub>                          | 57.2         | 533   | KD <sub>2</sub>                                                         | 36.4% $ \pm 11/2\rangle + 16.9\% \pm 7/2\rangle$  | 533   |
| ABILEG   | KD <sub>2</sub>                          | 80.6         | 406   | KD <sub>2</sub>                                                         | 26.7% $ \pm 11/2\rangle + 21.1\% \pm 3/2\rangle$  | 406   |
| ZOTSAE01 | KD <sub>4</sub>                          | 88.7         | 770   | KD <sub>2</sub>                                                         | 31.4% $ \pm 15/2\rangle + 30.2\% \pm 11/2\rangle$ | 391   |
| ANOVUW   | KD <sub>1</sub>                          | 18.6         | 173   | KD <sub>2</sub>                                                         | 26.4% $ \pm 1/2\rangle + 26.9\% \pm 3/2\rangle$   | 281   |
| LAJKAL   | KD <sub>4</sub>                          | 84.0         | 298   | KD <sub>4</sub>                                                         | 77.9% $ \pm 7/2\rangle$                           | 298   |

|        |                 |      |     |                 |                          |     |
|--------|-----------------|------|-----|-----------------|--------------------------|-----|
| LAJJUE | KD <sub>2</sub> | 89.4 | 213 | KD <sub>1</sub> | 36.3% ±13/2>+24.8% ±9/2> | 90  |
| FOXWUM | KD <sub>4</sub> | 89.1 | 243 | KD <sub>3</sub> | 80% ±9/2>                | 176 |

Table S12 The contributions of various KDs to  $U^{Zee}_{\text{eff}}$  angles between *ab initio* magnetic easy axis of ground KD and excited KDs and crystal field wave function compositions of DUXCUB and JEYRAK.

| DUXCUB          | E (K) | contribution <sup>a</sup> |       | $\theta$ (°) | composition                          |
|-----------------|-------|---------------------------|-------|--------------|--------------------------------------|
| KD <sub>0</sub> | 0     | 0.0%                      | 0.3%  |              | > 99.9% ±15/2>                       |
| KD <sub>1</sub> | 487   | 0.0%                      | 14.3% | 0.2          | 99.9% ±13/2>                         |
| KD <sub>2</sub> | 969   | 0.0%                      | 0.8%  | 0.8          | 99.0% ±11/2>                         |
| KD <sub>3</sub> | 1337  | 12.6%                     | 39.1% | 3.7          | 94.0% ±9/2>                          |
| KD <sub>4</sub> | 1479  | 25.3%                     | 18.7% | 88.7         | 51.6% ±1/2>+33.5% ±3/2>              |
| KD <sub>5</sub> | 1534  | 21.3%                     | 12.0% | 80.7         | 72.0% ±7/2>+13.4% ±5/2>              |
| KD <sub>6</sub> | 1624  | 40.7%                     | 14.7% | 89.2         | 44.6% ±5/2>+27.4% ±3/2>+14.8% ±7/2>  |
| KD <sub>7</sub> | 1733  | 0.1%                      | 0.0%  | 88.2         | 30.8% ±3/2>+30.7% ±1/2>+27.4% ±5/2>  |
| JEYRAK          | E (K) | contribution <sup>a</sup> |       | $\theta$ (°) | composition                          |
| KD <sub>0</sub> | 0     | 0.0%                      | 0.0%  |              | 99.6% ±15/2>                         |
| KD <sub>1</sub> | 347   | 0.0%                      | 0.3%  | 9.4          | 93.6% ±13/2>                         |
| KD <sub>2</sub> | 533   | 19.1%                     | 44.3% | 57.2         | 36.4% ±11/2>+16.9% ±7/2>+12.2% ±3/2> |
| KD <sub>3</sub> | 610   | 37.4%                     | 41.1% | 58.1         | 43.8% ±11/2>+18.4% ±1/2>+15.3% ±5/2> |
| KD <sub>4</sub> | 734   | 42.8%                     | 14.2% | 84.9         | 46.6% ±9/2>+17% ±3/2>+13.2% ±7/2>    |
| KD <sub>5</sub> | 881   | 0.7%                      | 0.1%  | 86.6         | 36.7% ±7/2>+24.2% ±9/2>+18.3% ±1/2>  |
| KD <sub>6</sub> | 1079  | 0.0%                      | 0.0%  | 88.2         | 34.9% ±5/2>+25.5% ±3/2>+23.5% ±7/2>  |
| KD <sub>7</sub> | 1467  | 0.0%                      | 0.0%  | 87.1         | 41.5% ±1/2>+31.3% ±3/2>+17.5% ±5/2>  |

<sup>a</sup> contribution to saturated  $U^{Zee}_{\text{eff}}$  is at the left side, contribution to  $U^{Zee}_{\text{eff}}$  reproducing  $U^{\text{exp}}_{\text{eff}}$  is at the right side.

Table S13 The distance R to Ln<sup>3+</sup> (in Å), atomic charge Q (in |e|) and angle  $\theta$  with respect to the *ab initio* magnetic easy axis (in °) of the atoms in the first sphere.

|                |                                |                   |                                |                    |
|----------------|--------------------------------|-------------------|--------------------------------|--------------------|
| DUXCUB         | N <sub>2</sub> -a <sup>a</sup> | N <sub>3</sub> -a | I <sub>4</sub> -e <sup>b</sup> | I <sub>5</sub> -e  |
| R              | 2.402                          | 2.438             | 2.977                          | 2.936              |
| Q <sup>c</sup> | 0.734                          | 0.728             | 0.745                          | 0.760              |
| $\theta$       | 10.2                           | 9.4               | 87.5                           | 89.5               |
| ABIKUV         | O <sub>2</sub> -a              | O <sub>3</sub> -a | Cl <sub>4</sub> -e             | Cl <sub>5</sub> -e |
| R              | 2.103                          | 2.082             | 2.549                          | 2.549              |
| Q              | 0.949                          | 0.949             | 0.841                          | 0.833              |
| $\theta$       | 25.7                           | 32.8              | 74.0                           | 79.6               |
| JEYRAK         | N <sub>3</sub> -a              | N <sub>4</sub> -a | O <sub>2</sub> -e              | C <sub>5</sub> -e  |
| R              | 2.132                          | 2.145             | 2.339                          | 2.464              |
| Q              | 1.117                          | 1.102             | 0.562                          | 0.823              |
| $\theta$       | 31.4                           | 25.7              | 89.5                           | 82.6               |
| ABILEG         | O <sub>2</sub> -a              | O <sub>3</sub> -a | O <sub>4</sub> -e              | Cl <sub>5</sub> -e |
| R              | 2.117                          | 2.133             | 2.091                          | 2.553              |
| Q              | 0.951                          | 0.954             | 0.953                          | 0.834              |
| $\theta$       | 31.4                           | 25.4              | 86.7                           | 82.3               |
| ZOTSAE01       | N <sub>2</sub> -a              | N <sub>4</sub> -a | N <sub>3</sub> -e              | N <sub>5</sub> -e  |
| R              | 2.295                          | 2.295             | 2.282                          | 2.282              |



|          |                    |                   |                   |                    |
|----------|--------------------|-------------------|-------------------|--------------------|
| Q        | 0.733              | 0.733             | 0.729             | 0.729              |
| $\theta$ | 44.7               | 44.7              | 49.4              | 49.4               |
| ANOVUW   | N <sub>2</sub> -a  | O <sub>3</sub> -a | O <sub>4</sub> -e | O <sub>5</sub> -e  |
| R        | 2.273              | 2.195             | 2.068             | 2.152              |
| Q        | 0.748              | 1.008             | 1.024             | 1.011              |
| $\theta$ | 14.1               | 38.6              | 78.1              | 67.2               |
| LAJKAL   | Cl <sub>5</sub> -a | N <sub>2</sub> -e | N <sub>3</sub> -e | N <sub>4</sub> -e  |
| R        | 2.571              | 2.249             | 2.247             | 2.242              |
| Q        | 0.779              | 1.261             | 1.262             | 1.264              |
| $\theta$ | 0.6                | 78.8              | 79.0              | 78.9               |
| FOXWUM   | Cl <sub>5</sub> -a | N <sub>2</sub> -e | N <sub>3</sub> -e | N <sub>4</sub> -e  |
| R        | 2.528              | 2.231             | 2.251             | 2.246              |
| Q        | 0.814              | 1.265             | 1.262             | 1.265              |
| $\theta$ | 7.4                | 82.9              | 79.4              | 72.8               |
| LAJJUE   | N <sub>3</sub> -a  | N <sub>2</sub> -e | N <sub>4</sub> -e | Cl <sub>5</sub> -e |
| R        | 2.274              | 2.269             | 2.265             | 2.601              |
| Q        | 1.265              | 1.261             | 1.263             | 0.780              |
| $\theta$ | 10.4               | 63.0              | 56.3              | 89.7               |

<sup>a</sup> “-a” indicates the atom occupying the axial position. <sup>b</sup> “-e” indicates the atom occupying the equatorial position.

<sup>c</sup>The atomic charges are absolute values obtained from the LoProp analysis.

Table S14 Theoretical prediction of  $\tau_{\text{QTM}}$  and  $U_{\text{eff}}$  in different Dy-O.

| Dy-O <sub>ave</sub> (Å) | $\tau_{\text{QTM-20}}^{\text{Zee}}$ (s) | $U_{\text{eff}}^{\text{Zee}}$ (K) | $\theta$ (°) <sup>a</sup> |
|-------------------------|-----------------------------------------|-----------------------------------|---------------------------|
|                         |                                         | 300 K                             |                           |

|      |           |      |      |
|------|-----------|------|------|
| 2.09 | 1.671E-01 | 986  | 0.0  |
| 1.79 | 8.798E-02 | 1364 | 4.4  |
| 1.89 | 1.756E-01 | 1377 | 2.4  |
| 1.99 | 2.072E-01 | 1236 | 1.3  |
| 2.19 | 1.382E-01 | 885  | 2.0  |
| 2.29 | 9.632E-02 | 720  | 3.8  |
| 2.39 | 3.894E-02 | 562  | 6.9  |
| 2.49 | 8.259E-03 | 429  | 12.4 |
| 2.59 | 3.347E-03 | 349  | 25.2 |

<sup>a</sup> The angle between the different magnetic easy axis.

Table S15 Theoretical prediction of  $\tau_{\text{QTM}}$  and  $U_{\text{eff}}$  with different  $\angle\text{O-Dy-O}$ .

| $\angle\text{O-Dy-O}$ (°) | $\tau_{\text{QTM-20}}^{\text{Zee}}$ (s) | $U_{\text{eff}}^{\text{Zee}}$ (K) | $\theta$ (°) <sup>a</sup> |
|---------------------------|-----------------------------------------|-----------------------------------|---------------------------|
|                           |                                         | 300 K                             |                           |
| 122.4                     | 1.671E-01                               | 986                               | 0.0                       |
| 115                       | 3.300E-03                               | 757                               | 5.7                       |
| 120                       | 4.432E-02                               | 955                               | 2.0                       |
| 130                       | 3.975E+00                               | 1279                              | 0.8                       |
| 140                       | 3.615E+01                               | 1632                              | 2.1                       |
| 150                       | 1.506E+02                               | 1916                              | 2.9                       |
| 160                       | 4.357E+02                               | 2181                              | 3.6                       |
| 170                       | 7.961E+02                               | 2335                              | 4.1                       |
| 180                       | 1.002E+03                               | 2423                              | 4.4                       |

<sup>a</sup> The angle between the different magnetic easy axis.

Table S16 Theoretical prediction of  $\tau_{\text{QTM}}$  and  $U_{\text{eff}}$  of structures having different Dy-Cl lengths.

| Dy-Cl <sub>ave</sub> (Å) | $\tau_{\text{QTM-20}}^{\text{Zee}}$ (s) | $U_{\text{eff}}^{\text{Zee}}$ (K) | $\theta$ (°) <sup>a</sup> |
|--------------------------|-----------------------------------------|-----------------------------------|---------------------------|
|                          |                                         | 300 K                             |                           |
| 2.55                     | 1.671E-01                               | 986                               | 0.0                       |
| 2.35                     | 8.576E-02                               | 974                               | 1.5                       |
| 2.45                     | 1.076E-01                               | 1004                              | 1.4                       |
| 2.65                     | 2.366E-01                               | 1106                              | 0.6                       |
| 2.75                     | 4.657E-01                               | 1169                              | 0.5                       |
| 2.85                     | 1.006E+00                               | 1231                              | 0.9                       |
| 2.95                     | 2.266E+00                               | 1290                              | 1.5                       |
| 3.05                     | 5.174E+00                               | 1344                              | 1.9                       |

<sup>a</sup> The angle between the different magnetic easy axis.

Table S17 Theoretical prediction of  $\tau_{\text{QTM}}$  and  $U_{\text{eff}}$  with different equatorial atom.

| equatorial atom | $\tau_{\text{QTM-20}}^{\text{Zee}}$ (s) | $U_{\text{eff}}^{\text{Zee}}$ (K) | $\theta$ (°) <sup>a</sup> |
|-----------------|-----------------------------------------|-----------------------------------|---------------------------|
|                 |                                         | 300 K                             |                           |
| Cl              | 1.671E-01                               | 986                               | 0.0                       |
| Br              | 6.282E-01                               | 1144                              | 0.5                       |
| I               | 3.361E+00                               | 1254                              | 1.5                       |
| None            | 1.471E+04                               | 2183                              | 6.0                       |

<sup>a</sup> The angle between the different magnetic easy axis.

Table S18 Prediction of  $T_{\text{B}}$  from calculated  $U_{\text{eff}}$ .

| $\angle\text{O-Dy-O}$ (°) | $U_{\text{eff}}^{\text{Zee}}$ (K) | $T_{\text{B}}^{100}$ (K) |
|---------------------------|-----------------------------------|--------------------------|
|                           |                                   |                          |
|                           |                                   |                          |

|       |      |    |
|-------|------|----|
| 115   | 757  |    |
| 120   | 955  |    |
| 122.4 | 986  |    |
| 130   | 1279 |    |
| 140   | 1632 |    |
| 150   | 1916 | 49 |
| 160   | 2181 | 57 |
| 170   | 2335 | 62 |
| 180   | 2423 | 64 |

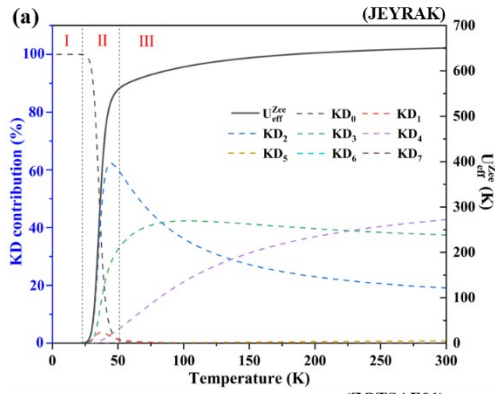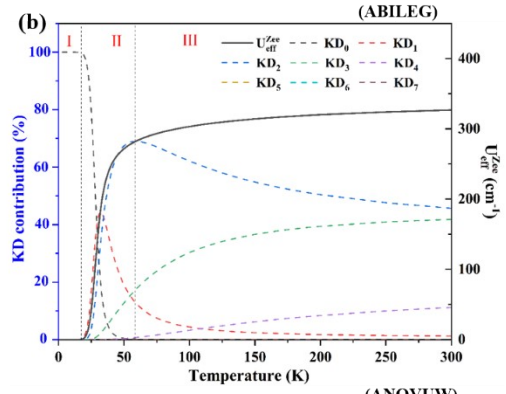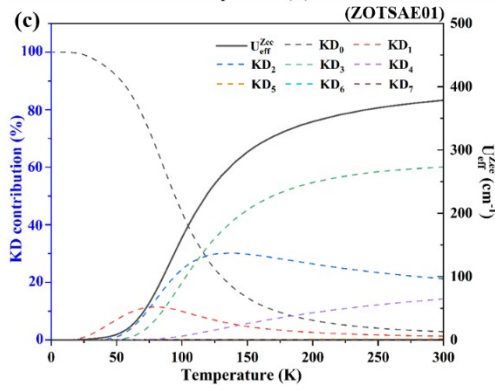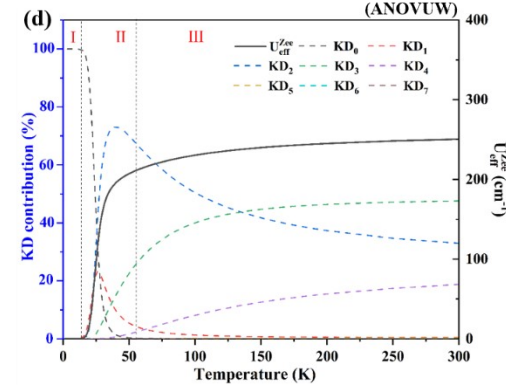

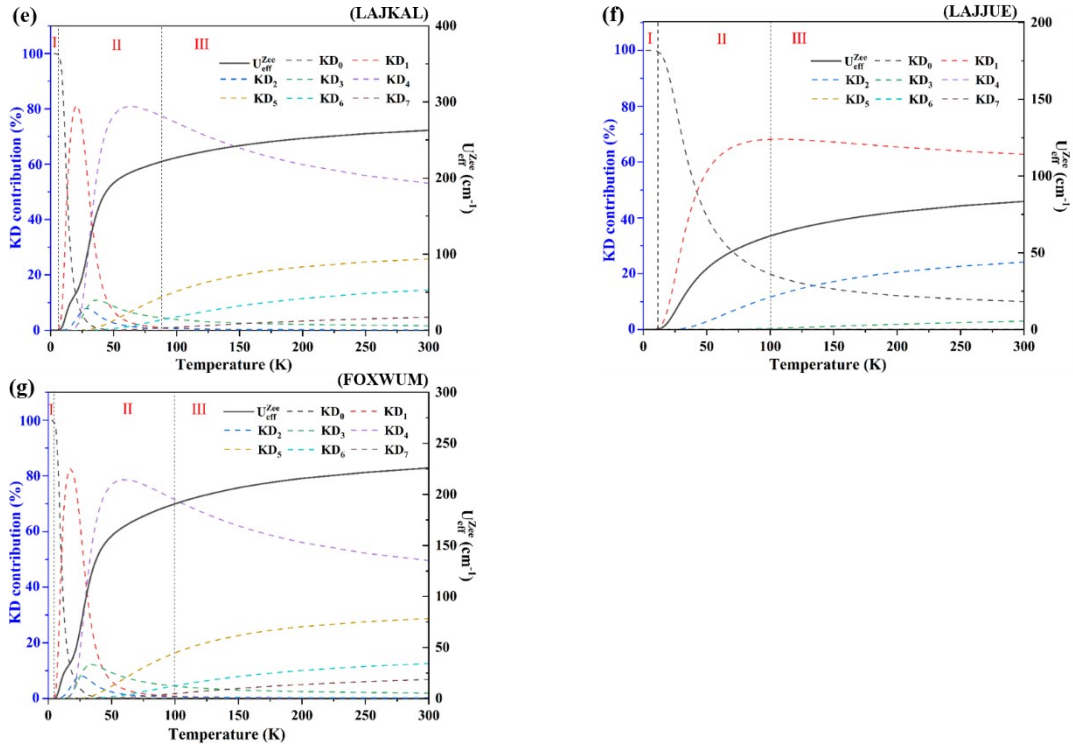

Figure S1  $U_{\text{eff}}^{\text{Zee}}$  and the contributions from various KDs of other SIMs.

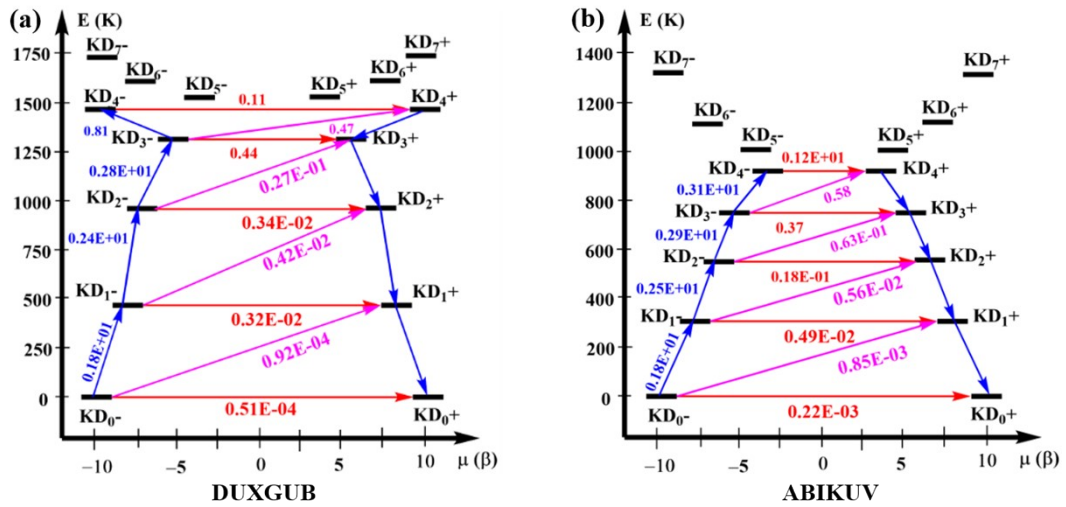

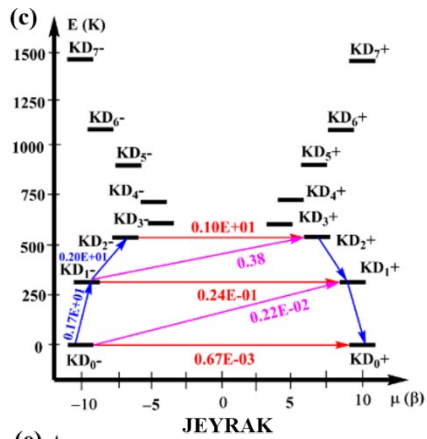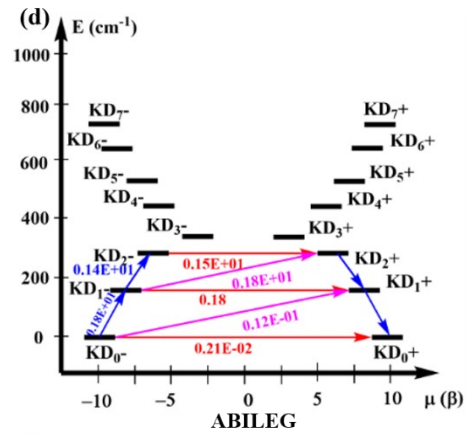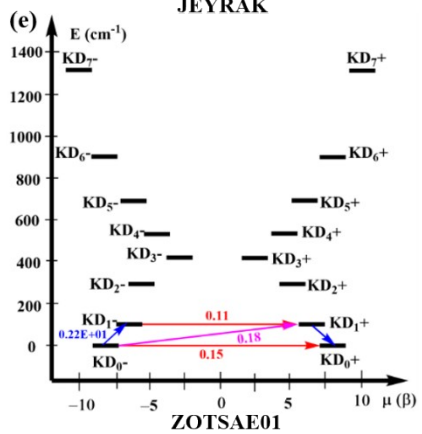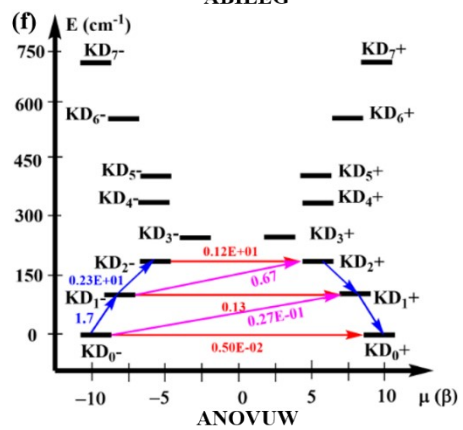

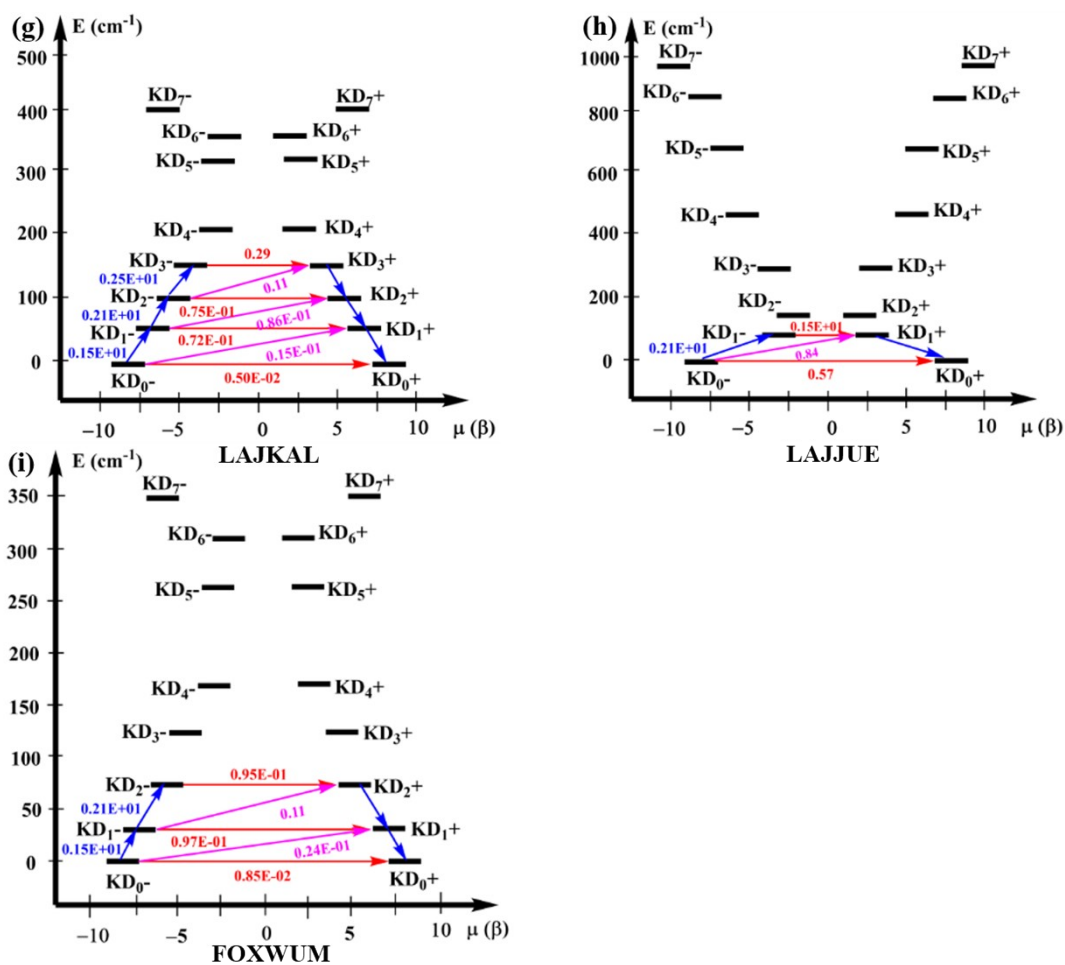

Figure S2 Possible relaxation mechanism based on transition magnetic moment for the Ln-SIMs studied here.

## Cartesian coordinates used in our calculations

### 1Dy (DUXGUB)

|    |              |             |              |
|----|--------------|-------------|--------------|
| Dy | 2.008338000  | 5.995324000 | 12.677982000 |
| N  | -0.108367000 | 7.092785000 | 12.387598000 |
| N  | 3.711990000  | 4.251897000 | 12.661612000 |
| I  | 3.255756000  | 8.033121000 | 14.454095000 |
| I  | 0.583493000  | 4.214839000 | 14.526514000 |
| C  | 1.537311000  | 6.360277000 | 9.884100000  |
| C  | 2.629210000  | 5.504386000 | 9.949935000  |

|   |              |              |              |
|---|--------------|--------------|--------------|
| C | 3.981193000  | 7.278037000  | 10.857386000 |
| C | 3.849792000  | 5.961328000  | 10.471274000 |
| C | 4.954004000  | 5.010575000  | 10.709703000 |
| C | 1.634712000  | 7.680452000  | 10.353840000 |
| C | 2.864550000  | 8.147006000  | 10.795110000 |
| C | -1.253995000 | 6.673948000  | 13.154483000 |
| C | 3.632192000  | 3.151437000  | 13.586857000 |
| C | -1.546607000 | 7.275116000  | 14.398225000 |
| C | -0.437312000 | 8.147363000  | 11.547761000 |
| C | 4.828993000  | 4.149379000  | 11.828893000 |
| C | 0.416283000  | 8.503769000  | 10.480171000 |
| C | 4.060541000  | 3.289180000  | 14.916006000 |
| C | 3.113418000  | 1.908898000  | 13.145586000 |
| C | -2.113660000 | 5.690398000  | 12.615350000 |
| C | 0.119447000  | 9.546990000  | 9.613644000  |
| C | 6.059723000  | 4.971605000  | 9.866307000  |
| C | -0.632703000 | 8.298036000  | 15.029882000 |
| C | -3.273897000 | 5.349264000  | 13.302166000 |
| C | -1.772735000 | 4.989731000  | 11.312891000 |
| C | 5.894969000  | 3.237511000  | 12.022838000 |
| C | 2.586825000  | 1.715313000  | 11.727472000 |
| C | -1.047813000 | 10.276154000 | 9.754210000  |
| C | -2.717203000 | 6.881284000  | 15.054792000 |
| C | 6.997166000  | 3.215014000  | 11.175884000 |
| C | -2.103125000 | 3.503740000  | 11.320008000 |
| C | -0.125077000 | 7.808251000  | 16.399955000 |
| C | 7.097036000  | 4.064670000  | 10.086942000 |



|   |              |              |              |
|---|--------------|--------------|--------------|
| C | 3.979720000  | 2.189797000  | 15.768298000 |
| C | 3.064208000  | 0.840671000  | 14.022789000 |
| C | -1.906420000 | 9.965907000  | 10.800448000 |
| C | 4.547587000  | 4.640603000  | 15.432007000 |
| C | -3.577091000 | 5.949949000  | 14.508542000 |
| C | -1.621978000 | 8.927297000  | 11.668754000 |
| C | 3.502977000  | 0.972127000  | 15.334145000 |
| C | 1.153681000  | 1.210799000  | 11.743485000 |
| C | -2.418471000 | 5.677347000  | 10.111853000 |
| C | 3.489310000  | 0.774866000  | 10.930338000 |
| C | 4.122420000  | 4.919142000  | 16.862577000 |
| C | -1.304444000 | 9.670261000  | 15.181124000 |
| C | 6.040870000  | 4.829710000  | 15.266531000 |
| H | 0.716689000  | 6.049107000  | 9.519234000  |
| H | 2.549268000  | 4.609407000  | 9.642629000  |
| H | 4.820422000  | 7.601480000  | 11.165226000 |
| H | 2.957750000  | 9.054484000  | 11.058876000 |
| H | 0.726049000  | 9.762468000  | 8.914248000  |
| H | 6.109723000  | 5.571019000  | 9.131805000  |
| H | 0.161199000  | 8.409535000  | 14.432922000 |
| H | -3.862921000 | 4.698824000  | 12.938278000 |
| H | -0.782332000 | 5.066289000  | 11.192752000 |
| H | 5.856782000  | 2.625882000  | 12.748621000 |
| H | 2.593102000  | 2.605671000  | 11.272287000 |
| H | -1.257454000 | 10.975374000 | 9.146716000  |
| H | -2.926174000 | 7.264160000  | 15.899772000 |
| H | 7.701370000  | 2.600130000  | 11.348246000 |

|   |              |              |              |
|---|--------------|--------------|--------------|
| H | -1.704706000 | 3.084998000  | 12.111573000 |
| H | -1.740875000 | 3.084978000  | 10.511647000 |
| H | -3.075286000 | 3.386048000  | 11.342178000 |
| H | -0.887987000 | 7.656065000  | 16.995741000 |
| H | 0.465120000  | 8.485607000  | 16.790746000 |
| H | 0.370784000  | 6.970591000  | 16.283908000 |
| H | 7.848245000  | 4.032053000  | 9.506512000  |
| H | 4.259137000  | 2.281196000  | 16.672137000 |
| H | 2.726553000  | 0.004234000  | 13.724683000 |
| H | -2.699427000 | 10.473639000 | 10.920409000 |
| H | 4.108534000  | 5.337304000  | 14.863641000 |
| H | -4.380468000 | 5.722207000  | 14.961663000 |
| H | -2.234820000 | 8.729703000  | 12.366851000 |
| H | 3.474391000  | 0.229691000  | 15.924949000 |
| H | 1.133672000  | 0.297016000  | 12.099989000 |
| H | 0.795545000  | 1.213131000  | 10.832120000 |
| H | 0.608363000  | 1.793791000  | 12.311603000 |
| H | -3.394101000 | 5.636868000  | 10.197972000 |
| H | -2.144157000 | 5.223502000  | 9.288101000  |
| H | -2.132794000 | 6.614647000  | 10.079095000 |
| H | 4.388792000  | 1.158271000  | 10.869557000 |
| H | 3.123003000  | 0.655368000  | 10.029364000 |
| H | 3.534878000  | -0.094534000 | 11.381786000 |
| H | 3.165308000  | 4.729891000  | 16.962166000 |
| H | 4.292024000  | 5.860501000  | 17.077554000 |
| H | 4.632934000  | 4.347754000  | 17.473150000 |
| H | -1.593955000 | 9.989636000  | 14.301021000 |

|   |              |              |              |
|---|--------------|--------------|--------------|
| H | -0.664866000 | 10.305841000 | 15.565100000 |
| H | -2.081306000 | 9.590374000  | 15.772124000 |
| H | 6.515697000  | 4.174603000  | 15.819845000 |
| H | 6.288783000  | 5.735124000  | 15.547183000 |
| H | 6.284354000  | 4.700578000  | 14.326216000 |

**2Dy (ABIKUV)**

|    |              |              |              |
|----|--------------|--------------|--------------|
| Dy | 4.707736000  | 28.425086000 | 11.121782000 |
| O  | 4.172541000  | 28.749041000 | 13.129320000 |
| O  | 5.496315000  | 29.932346000 | 9.920675000  |
| Cl | 3.009356000  | 27.373521000 | 9.537666000  |
| Cl | 6.374928000  | 26.534331000 | 11.503099000 |
| C  | 3.696091000  | 29.372573000 | 14.216962000 |
| C  | 2.390744000  | 29.051431000 | 14.694665000 |
| C  | 1.833031000  | 29.871868000 | 15.676621000 |
| C  | 2.509778000  | 30.950156000 | 16.249189000 |
| C  | 3.837528000  | 31.137684000 | 15.858402000 |
| C  | 4.468693000  | 30.355222000 | 14.885409000 |
| C  | 1.617895000  | 27.811399000 | 14.192443000 |
| C  | 0.325147000  | 27.567612000 | 15.010880000 |
| C  | 2.503924000  | 26.553553000 | 14.348013000 |
| C  | 1.167546000  | 27.948764000 | 12.714521000 |
| C  | -0.408095000 | 26.294763000 | 14.528949000 |
| C  | 0.504931000  | 25.088018000 | 14.689593000 |
| C  | 1.769705000  | 25.296175000 | 13.847482000 |
| C  | 1.397831000  | 25.469638000 | 12.388161000 |
| C  | 0.465905000  | 26.673102000 | 12.220753000 |
| C  | -0.800675000 | 26.452756000 | 13.056100000 |

|   |             |              |              |
|---|-------------|--------------|--------------|
| C | 1.809255000 | 31.867170000 | 17.268684000 |
| C | 1.151990000 | 31.055172000 | 18.353958000 |
| C | 0.742502000 | 32.666978000 | 16.553059000 |
| C | 2.739044000 | 32.869040000 | 17.905847000 |
| C | 5.987386000 | 30.519309000 | 14.648502000 |
| C | 6.627753000 | 31.495395000 | 15.659035000 |
| C | 6.674071000 | 29.151759000 | 14.835186000 |
| C | 6.321670000 | 31.071112000 | 13.244307000 |
| C | 8.152434000 | 31.599004000 | 15.450536000 |
| C | 8.787333000 | 30.216920000 | 15.628090000 |
| C | 8.193158000 | 29.257243000 | 14.608932000 |
| C | 8.459618000 | 29.765914000 | 13.196790000 |
| C | 7.845055000 | 31.162063000 | 13.021773000 |
| C | 8.445998000 | 32.116114000 | 14.041945000 |
| C | 5.535722000 | 30.908900000 | 9.008388000  |
| C | 4.558358000 | 31.933274000 | 8.968988000  |
| C | 4.668483000 | 32.908890000 | 7.966403000  |
| C | 5.663278000 | 32.933738000 | 7.008628000  |
| C | 6.608724000 | 31.921553000 | 7.080664000  |
| C | 6.602720000 | 30.917807000 | 8.044864000  |
| C | 3.361330000 | 32.141430000 | 9.934034000  |
| C | 3.131859000 | 31.068299000 | 11.013390000 |
| C | 3.545346000 | 33.493041000 | 10.674854000 |
| C | 2.044817000 | 32.207534000 | 9.106972000  |
| C | 1.924979000 | 31.402099000 | 11.907583000 |
| C | 2.154776000 | 32.743865000 | 12.596829000 |
| C | 2.333904000 | 33.830592000 | 11.552814000 |

|   |              |              |              |
|---|--------------|--------------|--------------|
| C | 1.081691000  | 33.902791000 | 10.670120000 |
| C | 0.839953000  | 32.555399000 | 9.988652000  |
| C | 0.662988000  | 31.472423000 | 11.050591000 |
| C | 5.725188000  | 33.986710000 | 5.897143000  |
| C | 4.836187000  | 35.200018000 | 6.190699000  |
| C | 5.267599000  | 33.351457000 | 4.587644000  |
| C | 7.153821000  | 34.517415000 | 5.725677000  |
| C | 7.747093000  | 29.874681000 | 8.075471000  |
| C | 7.202152000  | 28.438213000 | 7.866465000  |
| C | 8.518297000  | 29.944066000 | 9.398329000  |
| C | 8.764584000  | 30.135814000 | 6.940143000  |
| C | 8.354944000  | 27.413839000 | 7.907049000  |
| C | 9.093206000  | 27.516042000 | 9.244619000  |
| C | 9.662788000  | 28.918755000 | 9.427245000  |
| C | 10.641246000 | 29.210361000 | 8.295976000  |
| C | 9.906950000  | 29.108627000 | 6.966861000  |
| C | 9.340358000  | 27.712009000 | 6.774089000  |
| H | 0.967111000  | 29.690950000 | 15.963649000 |
| H | 4.325962000  | 31.816443000 | 16.265084000 |
| H | 0.550297000  | 27.473379000 | 15.949969000 |
| H | -0.264051000 | 28.333010000 | 14.919550000 |
| H | 3.323212000  | 26.671461000 | 13.842612000 |
| H | 2.740042000  | 26.438645000 | 15.281336000 |
| H | 0.562003000  | 28.701409000 | 12.631849000 |
| H | 1.942627000  | 28.125322000 | 12.157866000 |
| H | -1.217093000 | 26.163259000 | 15.066902000 |
| H | 0.043691000  | 24.285631000 | 14.399200000 |

|   |              |              |              |
|---|--------------|--------------|--------------|
| H | 0.744965000  | 24.979486000 | 15.623304000 |
| H | 2.356936000  | 24.516994000 | 13.942819000 |
| H | 0.954886000  | 24.668048000 | 12.066992000 |
| H | 2.200359000  | 25.602784000 | 11.859931000 |
| H | 0.224728000  | 26.774508000 | 11.275695000 |
| H | -1.398751000 | 27.209058000 | 12.953221000 |
| H | -1.261935000 | 25.655901000 | 12.750539000 |
| H | 0.549473000  | 30.420154000 | 17.959654000 |
| H | 0.662546000  | 31.638854000 | 18.939259000 |
| H | 1.823770000  | 30.588882000 | 18.857027000 |
| H | 1.157976000  | 33.270539000 | 15.932687000 |
| H | 0.233733000  | 33.167726000 | 17.194754000 |
| H | 0.160033000  | 32.070263000 | 16.077723000 |
| H | 2.245091000  | 33.420561000 | 18.517122000 |
| H | 3.132119000  | 33.419249000 | 17.224532000 |
| H | 3.431701000  | 32.405048000 | 18.381775000 |
| H | 6.229162000  | 32.373356000 | 15.555394000 |
| H | 6.447380000  | 31.188786000 | 16.561378000 |
| H | 6.503848000  | 28.825506000 | 15.732711000 |
| H | 6.298408000  | 28.514162000 | 14.208067000 |
| H | 5.932331000  | 30.492118000 | 12.570500000 |
| H | 5.929313000  | 31.952777000 | 13.144099000 |
| H | 8.530397000  | 32.218176000 | 16.109902000 |
| H | 9.746996000  | 30.276929000 | 15.503362000 |
| H | 8.617070000  | 29.889870000 | 16.525546000 |
| H | 8.601185000  | 28.372672000 | 14.718745000 |
| H | 8.073438000  | 29.154478000 | 12.550597000 |

|   |              |              |              |
|---|--------------|--------------|--------------|
| H | 9.416369000  | 29.807827000 | 13.039444000 |
| H | 8.026184000  | 31.490378000 | 12.116437000 |
| H | 8.063171000  | 33.000685000 | 13.929494000 |
| H | 9.404119000  | 32.180389000 | 13.907173000 |
| H | 4.029305000  | 33.584133000 | 7.945739000  |
| H | 7.289131000  | 31.913396000 | 6.446257000  |
| H | 2.984805000  | 30.210356000 | 10.585063000 |
| H | 3.927175000  | 30.993991000 | 11.564211000 |
| H | 4.340068000  | 33.448222000 | 11.229092000 |
| H | 3.674850000  | 34.199882000 | 10.023436000 |
| H | 2.136299000  | 32.876588000 | 8.410844000  |
| H | 1.891530000  | 31.350201000 | 8.679271000  |
| H | 1.819427000  | 30.702478000 | 12.585414000 |
| H | 1.396664000  | 32.955491000 | 13.163089000 |
| H | 2.946189000  | 32.693420000 | 13.156173000 |
| H | 2.477152000  | 34.693457000 | 11.995785000 |
| H | 0.312950000  | 34.136310000 | 11.212571000 |
| H | 1.197311000  | 34.592051000 | 9.996786000  |
| H | 0.032583000  | 32.607673000 | 9.435345000  |
| H | 0.506312000  | 30.615230000 | 10.624260000 |
| H | -0.102791000 | 31.679548000 | 11.608346000 |
| H | 5.094593000  | 35.591062000 | 7.028430000  |
| H | 3.918582000  | 34.920789000 | 6.237606000  |
| H | 4.937598000  | 35.848304000 | 5.489988000  |
| H | 4.358447000  | 33.056897000 | 4.674290000  |
| H | 5.829514000  | 32.600453000 | 4.382392000  |
| H | 5.328216000  | 33.998196000 | 3.879848000  |

|   |              |              |              |
|---|--------------|--------------|--------------|
| H | 7.436404000  | 34.944230000 | 6.537638000  |
| H | 7.174780000  | 35.153042000 | 5.006112000  |
| H | 7.744456000  | 33.787836000 | 5.524974000  |
| H | 6.558494000  | 28.230666000 | 8.561799000  |
| H | 6.749743000  | 28.383642000 | 7.010455000  |
| H | 7.910871000  | 29.770040000 | 10.134635000 |
| H | 8.880903000  | 30.836279000 | 9.513266000  |
| H | 8.310932000  | 30.090057000 | 6.084133000  |
| H | 9.132627000  | 31.028262000 | 7.036851000  |
| H | 7.994027000  | 26.509249000 | 7.799891000  |
| H | 8.480822000  | 27.316840000 | 9.970846000  |
| H | 9.812555000  | 26.866022000 | 9.270237000  |
| H | 10.130611000 | 28.973325000 | 10.286604000 |
| H | 11.011537000 | 30.101027000 | 8.401426000  |
| H | 11.372312000 | 28.572765000 | 8.319125000  |
| H | 10.532823000 | 29.304876000 | 6.237776000  |
| H | 10.058219000 | 27.060254000 | 6.780751000  |
| H | 8.885635000  | 27.655516000 | 5.918568000  |

**3Dy (JEYRAK)**

|    |              |             |             |
|----|--------------|-------------|-------------|
| Dy | 0.234462000  | 7.615890000 | 6.218107000 |
| O  | 1.634834000  | 9.378595000 | 6.852734000 |
| N  | 1.075383000  | 6.106734000 | 7.466919000 |
| N  | 0.436096000  | 7.621615000 | 4.082930000 |
| N  | 2.539058000  | 4.882245000 | 8.950013000 |
| N  | -0.014004000 | 7.006870000 | 1.781229000 |
| N  | 0.460344000  | 4.182843000 | 8.798419000 |
| N  | 0.945385000  | 8.962261000 | 2.114735000 |



|   |              |              |              |
|---|--------------|--------------|--------------|
| C | 5.565949000  | 6.335462000  | 7.386758000  |
| C | 0.216111000  | 4.612552000  | 1.439223000  |
| C | 1.641677000  | 4.824987000  | 0.965607000  |
| C | 3.740047000  | 5.639658000  | 8.776369000  |
| C | 6.006495000  | 7.181629000  | 8.390494000  |
| C | 4.441986000  | 5.528996000  | 7.559024000  |
| C | -0.551363000 | 5.684925000  | 1.908935000  |
| C | -2.476885000 | 10.085343000 | 7.644008000  |
| C | -1.908130000 | 8.797002000  | 7.809384000  |
| C | 3.416181000  | 6.627754000  | 11.121251000 |
| C | -0.952430000 | 3.400228000  | 6.987791000  |
| C | -1.969339000 | 4.416223000  | 8.979872000  |
| C | 1.324050000  | 5.184467000  | 8.299308000  |
| C | 3.976787000  | 4.554568000  | 6.493043000  |
| C | 4.296206000  | 3.107864000  | 6.895226000  |
| C | -2.221435000 | 3.333662000  | 6.405991000  |
| C | 0.143626000  | 7.630175000  | 0.545049000  |
| C | -2.678963000 | 6.699194000  | 2.875691000  |
| C | 4.170692000  | 6.476656000  | 9.813180000  |
| C | -0.365559000 | 3.342786000  | 1.451627000  |
| C | 0.460041000  | 7.822559000  | 2.834117000  |
| C | -1.834010000 | 4.968329000  | 10.386480000 |
| C | 1.142826000  | 3.319030000  | 9.646197000  |
| C | 5.334346000  | 7.238307000  | 9.587167000  |
| C | 4.553062000  | 4.830603000  | 5.110553000  |
| C | -3.221469000 | 4.295661000  | 8.356041000  |
| C | 2.404908000  | 3.753037000  | 9.758514000  |

|   |              |              |              |
|---|--------------|--------------|--------------|
| C | 0.241569000  | 2.792918000  | 6.273232000  |
| C | -1.860989000 | 5.516892000  | 2.411492000  |
| C | 4.329945000  | 6.536678000  | 12.343420000 |
| C | -3.334601000 | 3.793964000  | 7.083570000  |
| C | -0.846834000 | 3.976114000  | 8.254059000  |
| C | -0.716918000 | 9.720236000  | 9.741058000  |
| C | 1.203386000  | 10.234828000 | 2.720881000  |
| C | -2.140456000 | 7.716935000  | 6.867664000  |
| C | -3.802287000 | 6.333786000  | 3.849567000  |
| C | 0.704629000  | 8.825575000  | 0.748552000  |
| C | -1.012649000 | 8.654251000  | 8.898104000  |
| C | -2.178690000 | 11.131783000 | 8.489259000  |
| C | -1.654146000 | 3.153518000  | 1.911002000  |
| C | 2.084139000  | 3.834204000  | -0.107953000 |
| C | 2.637398000  | 7.949339000  | 11.139856000 |
| C | 2.525916000  | 10.620030000 | 2.985941000  |
| C | -2.885267000 | 6.034397000  | 10.714934000 |
| C | 1.669277000  | 12.751666000 | 3.757692000  |
| C | 0.110258000  | 11.082366000 | 2.962972000  |
| C | 3.683036000  | 9.683877000  | 2.701128000  |
| C | 0.381476000  | 12.356341000 | 3.482066000  |
| C | 2.905717000  | 9.212440000  | 7.533758000  |
| C | 2.601322000  | 4.764593000  | 2.159065000  |
| C | -1.909181000 | 3.824829000  | 11.413185000 |
| C | 0.546385000  | 3.486884000  | 4.956662000  |
| C | 0.033438000  | 1.297435000  | 6.072944000  |
| C | -1.307337000 | 10.954275000 | 9.545823000  |

|   |              |              |              |
|---|--------------|--------------|--------------|
| C | 4.944199000  | 10.401478000 | 2.246346000  |
| C | 2.726041000  | 11.893681000 | 3.528004000  |
| C | -2.375482000 | 4.207225000  | 2.400237000  |
| C | 1.265021000  | 10.778171000 | 6.830914000  |
| C | -1.326816000 | 10.655002000 | 2.685050000  |
| C | -3.270974000 | 7.442867000  | 1.669830000  |
| C | 3.961227000  | 8.808844000  | 3.886317000  |
| C | -2.151332000 | 10.661846000 | 3.964411000  |
| C | 2.411521000  | 11.501070000 | 7.304071000  |
| C | 3.454926000  | 10.589965000 | 7.660087000  |
| C | -1.967909000 | 11.500061000 | 1.605517000  |
| H | 6.030643000  | 6.303400000  | 6.581703000  |
| H | 1.698017000  | 5.724585000  | 0.582075000  |
| H | 6.758123000  | 7.713016000  | 8.253531000  |
| H | -3.070033000 | 10.228594000 | 6.942496000  |
| H | 2.766575000  | 5.895874000  | 11.178099000 |
| H | 3.001648000  | 4.633886000  | 6.426732000  |
| H | 5.247361000  | 2.985020000  | 6.919734000  |
| H | 3.911022000  | 2.505053000  | 6.255316000  |
| H | 3.927964000  | 2.928923000  | 7.764503000  |
| H | -2.317533000 | 2.974990000  | 5.553253000  |
| H | -0.099354000 | 7.275220000  | -0.279599000 |
| H | -2.074125000 | 7.316004000  | 3.338167000  |
| H | 0.122406000  | 2.613028000  | 1.144626000  |
| H | -0.950575000 | 5.384145000  | 10.463678000 |
| H | 0.784778000  | 2.568693000  | 10.063287000 |
| H | 5.653518000  | 7.791897000  | 10.263299000 |

|   |              |              |              |
|---|--------------|--------------|--------------|
| H | 4.209729000  | 5.663375000  | 4.780905000  |
| H | 4.304148000  | 4.121645000  | 4.513089000  |
| H | 5.510591000  | 4.878791000  | 5.167952000  |
| H | -3.987411000 | 4.560013000  | 8.813027000  |
| H | 3.071704000  | 3.370396000  | 10.281674000 |
| H | 1.022068000  | 2.907415000  | 6.854158000  |
| H | 4.849195000  | 5.731064000  | 12.296173000 |
| H | 3.796478000  | 6.527629000  | 13.141677000 |
| H | 4.917672000  | 7.295922000  | 12.360463000 |
| H | -4.168163000 | 3.763667000  | 6.672429000  |
| H | -0.117005000 | 9.601429000  | 10.442203000 |
| H | -2.725766000 | 7.969003000  | 6.135213000  |
| H | -2.455955000 | 6.902845000  | 7.289371000  |
| H | -4.459266000 | 5.802080000  | 3.395061000  |
| H | -4.212403000 | 7.136398000  | 4.180087000  |
| H | -3.438455000 | 5.834423000  | 4.584407000  |
| H | 0.900116000  | 9.456560000  | 0.093483000  |
| H | -0.613986000 | 7.828589000  | 9.052844000  |
| H | -2.568463000 | 11.964886000 | 8.346807000  |
| H | -2.033757000 | 2.304660000  | 1.887390000  |
| H | 2.024002000  | 2.939848000  | 0.237911000  |
| H | 2.991983000  | 4.018753000  | -0.359232000 |
| H | 1.515275000  | 3.918726000  | -0.875914000 |
| H | 3.246556000  | 8.680970000  | 11.017685000 |
| H | 2.188726000  | 8.043819000  | 11.983407000 |
| H | 1.990284000  | 7.949221000  | 10.431223000 |
| H | -3.756255000 | 5.631672000  | 10.728807000 |

|   |              |              |              |
|---|--------------|--------------|--------------|
| H | -2.860839000 | 6.723851000  | 10.048403000 |
| H | -2.695554000 | 6.415236000  | 11.576470000 |
| H | 1.828871000  | 13.600244000 | 4.103050000  |
| H | 3.404306000  | 9.096299000  | 1.967528000  |
| H | -0.321684000 | 12.944616000 | 3.640712000  |
| H | 2.777858000  | 8.810827000  | 8.408111000  |
| H | 2.311175000  | 5.380832000  | 2.834462000  |
| H | 3.486422000  | 5.000630000  | 1.869153000  |
| H | 2.609821000  | 3.874689000  | 2.518320000  |
| H | -1.821532000 | 4.184480000  | 12.299113000 |
| H | -1.197736000 | 3.201582000  | 11.249165000 |
| H | -2.753456000 | 3.376407000  | 11.331576000 |
| H | 1.336564000  | 3.105528000  | 4.568214000  |
| H | 0.686554000  | 4.424034000  | 5.112849000  |
| H | -0.193551000 | 3.371400000  | 4.354581000  |
| H | -0.710460000 | 1.153514000  | 5.483175000  |
| H | -0.143237000 | 0.881898000  | 6.919160000  |
| H | 0.825278000  | 0.913487000  | 5.686862000  |
| H | -1.118531000 | 11.661082000 | 10.120088000 |
| H | 5.299479000  | 10.916930000 | 2.973675000  |
| H | 4.733465000  | 10.985744000 | 1.513367000  |
| H | 5.595523000  | 9.755902000  | 1.962751000  |
| H | 3.589233000  | 12.169643000 | 3.736377000  |
| H | -3.229308000 | 4.053467000  | 2.735604000  |
| H | 0.503379000  | 10.935933000 | 7.410761000  |
| H | -1.301373000 | 9.731807000  | 2.358434000  |
| H | -2.558841000 | 7.785207000  | 1.125562000  |

|   |              |              |             |
|---|--------------|--------------|-------------|
| H | -3.815912000 | 8.169758000  | 1.979656000 |
| H | -3.807269000 | 6.837439000  | 1.153538000 |
| H | 4.683290000  | 8.210725000  | 3.681550000 |
| H | 3.175436000  | 8.299944000  | 4.101075000 |
| H | 4.202385000  | 9.355402000  | 4.638659000 |
| H | -2.125594000 | 11.537444000 | 4.358095000 |
| H | -1.787961000 | 10.023185000 | 4.583144000 |
| H | -3.060307000 | 10.428964000 | 3.762102000 |
| H | 2.160856000  | 12.043816000 | 8.063533000 |
| H | 2.721726000  | 12.099693000 | 6.596839000 |
| H | 3.740431000  | 10.754125000 | 8.573325000 |
| H | 4.218297000  | 10.701919000 | 7.073923000 |
| H | -2.882435000 | 11.231211000 | 1.487688000 |
| H | -1.491645000 | 11.380506000 | 0.779859000 |
| H | -1.937250000 | 12.425007000 | 1.860632000 |
| H | 3.635842000  | 9.108302000  | 6.903955000 |
| H | 1.380015000  | 11.153507000 | 5.944204000 |

**4Dy (ABILEG)**

|    |              |              |             |
|----|--------------|--------------|-------------|
| Dy | 9.646741000  | 8.971268000  | 8.178028000 |
| O  | 10.929617000 | 9.427767000  | 6.557348000 |
| O  | 7.681931000  | 8.181703000  | 7.925511000 |
| O  | 10.710859000 | 7.680142000  | 9.432804000 |
| Cl | 9.595745000  | 11.253172000 | 9.321731000 |
| C  | 11.945424000 | 9.402297000  | 5.678021000 |
| C  | 13.190484000 | 10.007696000 | 5.964381000 |
| C  | 14.248768000 | 9.760834000  | 5.087947000 |
| C  | 14.126238000 | 9.022208000  | 3.936723000 |

|   |              |              |             |
|---|--------------|--------------|-------------|
| C | 12.846677000 | 8.595098000  | 3.601190000 |
| C | 11.749368000 | 8.785142000  | 4.422666000 |
| C | 13.378106000 | 10.983387000 | 7.147422000 |
| C | 12.314364000 | 12.088387000 | 7.037506000 |
| C | 13.311867000 | 10.283946000 | 8.504015000 |
| C | 14.737026000 | 11.708299000 | 7.075109000 |
| C | 15.295532000 | 8.702855000  | 2.999545000 |
| C | 16.610573000 | 9.341561000  | 3.488382000 |
| C | 15.021206000 | 9.251437000  | 1.596672000 |
| C | 15.481604000 | 7.172704000  | 2.912770000 |
| C | 10.334227000 | 8.428564000  | 3.910690000 |
| C | 9.475236000  | 9.700098000  | 3.939615000 |
| C | 9.690604000  | 7.329442000  | 4.746629000 |
| C | 10.352069000 | 7.919167000  | 2.452859000 |
| C | 6.370687000  | 7.864309000  | 7.812702000 |
| C | 5.434219000  | 8.890940000  | 7.540805000 |
| C | 4.078725000  | 8.563751000  | 7.474277000 |
| C | 3.603117000  | 7.274584000  | 7.630473000 |
| C | 4.555342000  | 6.281259000  | 7.858983000 |
| C | 5.908321000  | 6.530080000  | 7.951543000 |
| C | 5.829603000  | 10.356437000 | 7.378824000 |
| C | 4.681605000  | 11.208698000 | 6.806105000 |
| C | 6.173427000  | 10.908937000 | 8.778805000 |
| C | 6.991103000  | 10.546481000 | 6.395367000 |
| C | 2.108199000  | 6.908210000  | 7.537913000 |
| C | 1.224482000  | 8.166029000  | 7.508988000 |
| C | 1.697158000  | 6.057908000  | 8.746987000 |

|   |              |              |              |
|---|--------------|--------------|--------------|
| C | 1.869026000  | 6.106889000  | 6.253633000  |
| C | 6.863374000  | 5.334956000  | 8.145342000  |
| C | 7.825044000  | 5.548511000  | 9.337062000  |
| C | 7.670763000  | 5.168422000  | 6.835030000  |
| C | 6.122630000  | 4.022279000  | 8.394099000  |
| C | 11.150214000 | 6.749513000  | 10.326304000 |
| C | 10.841205000 | 6.867066000  | 11.680005000 |
| C | 11.237224000 | 5.838476000  | 12.550654000 |
| C | 11.932699000 | 4.717802000  | 12.113883000 |
| C | 12.306905000 | 4.680577000  | 10.789108000 |
| C | 11.951238000 | 5.648431000  | 9.849038000  |
| C | 10.168058000 | 8.120967000  | 12.241154000 |
| C | 9.962670000  | 8.034761000  | 13.782868000 |
| C | 11.019929000 | 9.351357000  | 11.972149000 |
| C | 8.753736000  | 8.297297000  | 11.662649000 |
| C | 12.400980000 | 3.614761000  | 13.079985000 |
| C | 11.784864000 | 3.757784000  | 14.465503000 |
| C | 13.914720000 | 3.622598000  | 13.175438000 |
| C | 11.957846000 | 2.229592000  | 12.510158000 |
| C | 12.412144000 | 5.513245000  | 8.394099000  |
| C | 13.346991000 | 4.302447000  | 8.185838000  |
| C | 11.212098000 | 5.346711000  | 7.471385000  |
| C | 13.221289000 | 6.763227000  | 7.997824000  |
| H | 15.100242000 | 10.125014000 | 5.300402000  |
| H | 12.719567000 | 8.154548000  | 2.768722000  |
| H | 12.399082000 | 12.698567000 | 7.799484000  |
| H | 11.422482000 | 11.683436000 | 7.039965000  |



|   |              |              |             |
|---|--------------|--------------|-------------|
| H | 12.445788000 | 12.586049000 | 6.203766000 |
| H | 13.417540000 | 10.945163000 | 9.219336000 |
| H | 14.030256000 | 9.619535000  | 8.564845000 |
| H | 12.444963000 | 9.835735000  | 8.599353000 |
| H | 15.460423000 | 11.059190000 | 7.203103000 |
| H | 14.782008000 | 12.388442000 | 7.780914000 |
| H | 14.833943000 | 12.138348000 | 6.201105000 |
| H | 16.486416000 | 10.309161000 | 3.585715000 |
| H | 17.320965000 | 9.167347000  | 2.836812000 |
| H | 16.858877000 | 8.955791000  | 4.354316000 |
| H | 15.773406000 | 9.034355000  | 1.006395000 |
| H | 14.910633000 | 10.223739000 | 1.640494000 |
| H | 14.201641000 | 8.845761000  | 1.241008000 |
| H | 14.683214000 | 6.769144000  | 2.513949000 |
| H | 15.618470000 | 6.809269000  | 3.811939000 |
| H | 16.262957000 | 6.970435000  | 2.355988000 |
| H | 8.560458000  | 9.484055000  | 3.661065000 |
| H | 9.854086000  | 10.365645000 | 3.328801000 |
| H | 9.460865000  | 10.063573000 | 4.850384000 |
| H | 9.635313000  | 7.621111000  | 5.681290000 |
| H | 10.233529000 | 6.515876000  | 4.690485000 |
| H | 8.789644000  | 7.145785000  | 4.408493000 |
| H | 10.796747000 | 8.579052000  | 1.880139000 |
| H | 9.432995000  | 7.783276000  | 2.140785000 |
| H | 10.839860000 | 7.069238000  | 2.408921000 |
| H | 3.453395000  | 9.259058000  | 7.310358000 |
| H | 4.255518000  | 5.385739000  | 7.954812000 |

|   |             |              |              |
|---|-------------|--------------|--------------|
| H | 3.954135000 | 11.258854000 | 7.461550000  |
| H | 4.351212000 | 10.799417000 | 5.980897000  |
| H | 5.010657000 | 12.112368000 | 6.615198000  |
| H | 6.551972000 | 11.808728000 | 8.688876000  |
| H | 6.827920000 | 10.320857000 | 9.209617000  |
| H | 5.360208000 | 10.948729000 | 9.322252000  |
| H | 7.037432000 | 9.776273000  | 5.791205000  |
| H | 7.831898000 | 10.624458000 | 6.891434000  |
| H | 6.844294000 | 11.362869000 | 5.871415000  |
| H | 1.302799000 | 8.638612000  | 8.363728000  |
| H | 0.291115000 | 7.906589000  | 7.362886000  |
| H | 1.517746000 | 8.754637000  | 6.782126000  |
| H | 0.739228000 | 5.857872000  | 8.695616000  |
| H | 1.885346000 | 6.550691000  | 9.571674000  |
| H | 2.205762000 | 5.219107000  | 8.743863000  |
| H | 0.920994000 | 5.866688000  | 6.189737000  |
| H | 2.411419000 | 5.289816000  | 6.273071000  |
| H | 2.122422000 | 6.648123000  | 5.477714000  |
| H | 7.305375000 | 5.715201000  | 10.150468000 |
| H | 8.403337000 | 6.319151000  | 9.155064000  |
| H | 8.376436000 | 4.748111000  | 9.458634000  |
| H | 8.294689000 | 4.418198000  | 6.929847000  |
| H | 8.174341000 | 5.990217000  | 6.655433000  |
| H | 7.056767000 | 4.992014000  | 6.093590000  |
| H | 5.501542000 | 4.134914000  | 9.145201000  |
| H | 6.769064000 | 3.317861000  | 8.609592000  |
| H | 5.621488000 | 3.772537000  | 7.591048000  |

|   |              |              |              |
|---|--------------|--------------|--------------|
| H | 11.021938000 | 5.912181000  | 13.471662000 |
| H | 12.841658000 | 3.951923000  | 10.496269000 |
| H | 10.835856000 | 7.982430000  | 14.226523000 |
| H | 9.439067000  | 7.235243000  | 13.999113000 |
| H | 9.486176000  | 8.832066000  | 14.094075000 |
| H | 11.805976000 | 9.338348000  | 12.556815000 |
| H | 10.492770000 | 10.157772000 | 12.150531000 |
| H | 11.309126000 | 9.350534000  | 11.035608000 |
| H | 8.170273000  | 7.586825000  | 12.001248000 |
| H | 8.791114000  | 8.250902000  | 10.684167000 |
| H | 8.396608000  | 9.169620000  | 11.933737000 |
| H | 12.054654000 | 4.614041000  | 14.855589000 |
| H | 12.093923000 | 3.024487000  | 15.036805000 |
| H | 10.807583000 | 3.724771000  | 14.391802000 |
| H | 14.299776000 | 3.559981000  | 12.276876000 |
| H | 14.212442000 | 2.860030000  | 13.713390000 |
| H | 14.210217000 | 4.456305000  | 13.599627000 |
| H | 12.304240000 | 1.514516000  | 13.081721000 |
| H | 12.311194000 | 2.122384000  | 11.601328000 |
| H | 10.978885000 | 2.184765000  | 12.485688000 |
| H | 13.626491000 | 4.262636000  | 7.247909000  |
| H | 12.872178000 | 3.477890000  | 8.421058000  |
| H | 14.137891000 | 4.397273000  | 8.758355000  |
| H | 10.659605000 | 6.155634000  | 7.504649000  |
| H | 10.680532000 | 4.576131000  | 7.761129000  |
| H | 11.523606000 | 5.201886000  | 6.553356000  |
| H | 14.012168000 | 6.835895000  | 8.571382000  |

|                       |              |              |             |
|-----------------------|--------------|--------------|-------------|
| H                     | 12.663333000 | 7.560610000  | 8.106091000 |
| H                     | 13.502501000 | 6.685133000  | 7.061861000 |
| <b>5Dy (ZOTSAE01)</b> |              |              |             |
| Dy                    | 0.000000000  | 13.193372000 | 5.017800000 |
| N                     | 1.806078000  | 14.608770000 | 5.049914000 |
| N                     | 0.884111000  | 11.782215000 | 6.578737000 |
| N                     | -1.806078000 | 14.608770000 | 4.985686000 |
| N                     | -0.884111000 | 11.782215000 | 3.456863000 |
| C                     | 2.831633000  | 15.010868000 | 4.205519000 |
| C                     | 3.866997000  | 15.899566000 | 4.573022000 |
| C                     | 4.835251000  | 16.294543000 | 3.661990000 |
| C                     | 4.822174000  | 15.832787000 | 2.352345000 |
| C                     | 3.802297000  | 14.971307000 | 1.975408000 |
| C                     | 2.823546000  | 14.577596000 | 2.869981000 |
| C                     | 1.895040000  | 14.946462000 | 6.424992000 |
| C                     | 0.803581000  | 15.572634000 | 7.041378000 |
| C                     | 0.819584000  | 15.849403000 | 8.407224000 |
| C                     | 1.914484000  | 15.526268000 | 9.178760000 |
| C                     | 3.005427000  | 14.892501000 | 8.585054000 |
| C                     | 2.994931000  | 14.606554000 | 7.233460000 |
| C                     | -1.380025000 | 11.216651000 | 7.201747000 |
| C                     | -0.129399000 | 11.750725000 | 7.547975000 |
| C                     | -0.020649000 | 12.349362000 | 8.823701000 |
| C                     | -1.089910000 | 12.368984000 | 9.694390000 |
| C                     | -2.324362000 | 11.814814000 | 9.330699000 |
| C                     | -2.461332000 | 11.258586000 | 8.073038000 |
| C                     | 2.171561000  | 11.352108000 | 6.912321000 |

|   |              |              |             |
|---|--------------|--------------|-------------|
| C | 3.231875000  | 11.581720000 | 6.014134000 |
| C | 4.521218000  | 11.134206000 | 6.275060000 |
| C | 4.806687000  | 10.430812000 | 7.439792000 |
| C | 3.778723000  | 10.186799000 | 8.325333000 |
| C | 2.482669000  | 10.640485000 | 8.082472000 |
| C | -2.831633000 | 15.010868000 | 5.830081000 |
| C | -3.866997000 | 15.899566000 | 5.462578000 |
| C | -4.835251000 | 16.294543000 | 6.373610000 |
| C | -4.822174000 | 15.832787000 | 7.683255000 |
| C | -3.802297000 | 14.971307000 | 8.060192000 |
| C | -2.823546000 | 14.577596000 | 7.165619000 |
| C | -1.895040000 | 14.946462000 | 3.610608000 |
| C | -0.803581000 | 15.572634000 | 2.994222000 |
| C | -0.819584000 | 15.849403000 | 1.628376000 |
| C | -1.914484000 | 15.526268000 | 0.856840000 |
| C | -3.005427000 | 14.892501000 | 1.450546000 |
| C | -2.994931000 | 14.606554000 | 2.802140000 |
| C | 1.380025000  | 11.216651000 | 2.833853000 |
| C | 0.129399000  | 11.750725000 | 2.487625000 |
| C | 0.020649000  | 12.349362000 | 1.211899000 |
| C | 1.089910000  | 12.368984000 | 0.341210000 |
| C | 2.324362000  | 11.814814000 | 0.704901000 |
| C | 2.461332000  | 11.258586000 | 1.962562000 |
| C | -2.171561000 | 11.352108000 | 3.123279000 |
| C | -3.231875000 | 11.581720000 | 4.021466000 |
| C | -4.521218000 | 11.134206000 | 3.760540000 |
| C | -4.806687000 | 10.430812000 | 2.595808000 |

|   |              |              |              |
|---|--------------|--------------|--------------|
| C | -3.778723000 | 10.186799000 | 1.710267000  |
| C | -2.482669000 | 10.640485000 | 1.953128000  |
| H | 3.900895000  | 16.232670000 | 5.461374000  |
| H | 5.520102000  | 16.892547000 | 3.937969000  |
| H | 5.490849000  | 16.098162000 | 1.732145000  |
| H | 3.775282000  | 14.645482000 | 1.083845000  |
| H | 2.130264000  | 13.999847000 | 2.573128000  |
| H | 0.044739000  | 15.811740000 | 6.523140000  |
| H | 0.067108000  | 16.265901000 | 8.811257000  |
| H | 1.925497000  | 15.732618000 | 10.105849000 |
| H | 3.759795000  | 14.656559000 | 9.112325000  |
| H | 3.744308000  | 14.172333000 | 6.842272000  |
| H | -1.490152000 | 10.814395000 | 6.348521000  |
| H | 0.801860000  | 12.744972000 | 9.086232000  |
| H | -0.987699000 | 12.763961000 | 10.553437000 |
| H | -3.054296000 | 11.820827000 | 9.937251000  |
| H | -3.300360000 | 10.903012000 | 7.803683000  |
| H | 3.061179000  | 12.055028000 | 5.208476000  |
| H | 5.215533000  | 11.311281000 | 5.650043000  |
| H | 5.688733000  | 10.126034000 | 7.621035000  |
| H | 3.957679000  | 9.697192000  | 9.120353000  |
| H | 1.799884000  | 10.464676000 | 8.718929000  |
| H | -3.900895000 | 16.232670000 | 4.574226000  |
| H | -5.520102000 | 16.892547000 | 6.097631000  |
| H | -5.490849000 | 16.098162000 | 8.303455000  |
| H | -3.775282000 | 14.645482000 | 8.951755000  |
| H | -2.130264000 | 13.999847000 | 7.462472000  |

|   |              |              |              |
|---|--------------|--------------|--------------|
| H | -0.044739000 | 15.811740000 | 3.512460000  |
| H | -0.067108000 | 16.265901000 | 1.224343000  |
| H | -1.925497000 | 15.732618000 | -0.070249000 |
| H | -3.759795000 | 14.656559000 | 0.923275000  |
| H | -3.744308000 | 14.172333000 | 3.193328000  |
| H | 1.490152000  | 10.814395000 | 3.687079000  |
| H | -0.801860000 | 12.744972000 | 0.949368000  |
| H | 0.987699000  | 12.763961000 | -0.517837000 |
| H | 3.054296000  | 11.820827000 | 0.098349000  |
| H | 3.300360000  | 10.903012000 | 2.231917000  |
| H | -3.061179000 | 12.055028000 | 4.827124000  |
| H | -5.215533000 | 11.311281000 | 4.385557000  |
| H | -5.688733000 | 10.126034000 | 2.414565000  |
| H | -3.957679000 | 9.697192000  | 0.915247000  |
| H | -1.799884000 | 10.464676000 | 1.316671000  |

**6Dy (ANOVUW)**

|    |              |              |             |
|----|--------------|--------------|-------------|
| Dy | -0.864269000 | 13.041542000 | 4.400018000 |
| N  | -2.020499000 | 12.531279000 | 2.510962000 |
| O  | -0.889826000 | 14.938751000 | 5.502935000 |
| O  | -0.764937000 | 11.460730000 | 5.729191000 |
| O  | 1.136480000  | 13.768153000 | 4.083394000 |
| Li | 0.940918000  | 15.319619000 | 5.175971000 |
| O  | 2.149054000  | 16.417619000 | 6.134912000 |
| C  | -1.929915000 | 15.771099000 | 5.984716000 |
| C  | -1.691316000 | 17.212224000 | 5.501395000 |
| C  | -1.087522000 | 17.445187000 | 4.288277000 |
| C  | -0.967768000 | 18.740032000 | 3.789550000 |

|   |              |              |              |
|---|--------------|--------------|--------------|
| C | -1.445620000 | 19.807331000 | 4.511644000  |
| C | -2.034140000 | 19.590620000 | 5.707432000  |
| C | -2.162992000 | 18.306611000 | 6.211935000  |
| C | -1.915472000 | 15.702474000 | 7.527110000  |
| C | -0.774304000 | 16.144925000 | 8.195287000  |
| C | -0.707407000 | 16.143119000 | 9.572080000  |
| C | -1.768270000 | 15.702474000 | 10.303802000 |
| C | -2.888980000 | 15.272665000 | 9.676062000  |
| C | -2.969274000 | 15.274471000 | 8.295418000  |
| C | -3.260452000 | 15.236547000 | 5.399339000  |
| C | -3.546160000 | 13.869466000 | 5.484065000  |
| C | -4.649526000 | 13.324078000 | 4.854398000  |
| C | -5.509765000 | 14.134936000 | 4.155411000  |
| C | -5.270414000 | 15.483958000 | 4.089941000  |
| C | -4.150227000 | 16.025734000 | 4.704203000  |
| C | 2.293404000  | 13.623860000 | 3.285047000  |
| C | 2.628138000  | 15.028866000 | 2.743958000  |
| C | 1.686087000  | 15.630238000 | 1.921733000  |
| C | 1.860133000  | 16.926888000 | 1.469221000  |
| C | 2.977768000  | 17.636615000 | 1.821603000  |
| C | 3.915179000  | 17.064138000 | 2.638051000  |
| C | 3.738733000  | 15.763876000 | 3.098265000  |
| C | 3.444111000  | 13.020683000 | 4.116900000  |
| C | 3.239122000  | 12.612545000 | 5.422446000  |
| C | 4.271452000  | 12.049098000 | 6.156094000  |
| C | 5.509817000  | 11.882954000 | 5.611153000  |
| C | 5.729749000  | 12.258585000 | 4.311384000  |



|   |              |              |              |
|---|--------------|--------------|--------------|
| C | 4.705141000  | 12.823838000 | 3.568108000  |
| C | 2.017312000  | 12.607128000 | 2.156655000  |
| C | 2.482474000  | 12.760631000 | 0.860736000  |
| C | 2.235673000  | 11.772792000 | -0.094354000 |
| C | 1.515978000  | 10.647704000 | 0.236847000  |
| C | 1.058356000  | 10.481560000 | 1.505807000  |
| C | 1.317348000  | 11.445921000 | 2.458971000  |
| C | -0.800465000 | 10.658540000 | 6.882039000  |
| C | 0.285413000  | 11.158780000 | 7.864087000  |
| C | 0.421551000  | 12.518637000 | 8.091306000  |
| C | 1.357972000  | 13.011654000 | 8.977075000  |
| C | 2.188153000  | 12.139394000 | 9.666434000  |
| C | 2.061477000  | 10.797596000 | 9.468099000  |
| C | 1.119040000  | 10.300968000 | 8.572702000  |
| C | -2.221170000 | 10.774119000 | 7.488598000  |
| C | -2.482851000 | 11.238240000 | 8.755633000  |
| C | -3.792361000 | 11.333954000 | 9.211996000  |
| C | -4.834334000 | 10.961934000 | 8.432134000  |
| C | -4.595319000 | 10.485172000 | 7.168951000  |
| C | -3.301788000 | 10.391264000 | 6.699108000  |
| C | -0.550302000 | 9.186715000  | 6.500773000  |
| C | 0.157948000  | 8.845396000  | 5.368529000  |
| C | 0.367611000  | 7.510821000  | 5.037329000  |
| C | -0.083233000 | 6.512148000  | 5.842223000  |
| C | -0.765724000 | 6.824572000  | 6.974467000  |
| C | -1.002352000 | 8.141087000  | 7.299891000  |
| C | -1.841959000 | 13.495640000 | 1.503881000  |

|   |              |              |              |
|---|--------------|--------------|--------------|
| C | -2.075356000 | 14.835633000 | 1.773463000  |
| C | -1.770376000 | 15.823471000 | 0.851108000  |
| C | -1.256222000 | 15.492988000 | -0.358159000 |
| C | -1.028852000 | 14.169248000 | -0.656624000 |
| C | -1.318900000 | 13.175992000 | 0.252252000  |
| C | -3.697628000 | 11.263523000 | 1.243928000  |
| C | -2.692813000 | 11.355625000 | 2.210571000  |
| C | -2.424502000 | 10.198030000 | 2.942293000  |
| C | -3.113764000 | 9.025988000  | 2.736256000  |
| C | -4.086803000 | 8.971811000  | 1.779240000  |
| C | -4.380873000 | 10.077034000 | 1.047518000  |
| C | 2.227290000  | 17.844296000 | 6.007824000  |
| C | 3.261766000  | 15.957109000 | 6.891667000  |
| C | 4.195702000  | 17.091227000 | 7.030309000  |
| C | 3.415733000  | 18.248822000 | 6.762653000  |
| H | -0.749332000 | 16.713790000 | 3.785699000  |
| H | -0.553179000 | 18.886311000 | 2.948070000  |
| H | -1.363899000 | 20.690425000 | 4.170816000  |
| H | -2.363744000 | 20.327436000 | 6.210010000  |
| H | -2.581016000 | 18.172973000 | 7.053416000  |
| H | -0.027401000 | 16.450125000 | 7.692710000  |
| H | 0.077983000  | 16.448319000 | 10.011114000 |
| H | -1.721880000 | 15.697057000 | 11.253116000 |
| H | -3.628321000 | 14.967465000 | 10.190193000 |
| H | -3.764615000 | 14.974689000 | 7.871789000  |
| H | -2.968869000 | 13.304213000 | 5.984716000  |
| H | -4.813840000 | 12.388611000 | 4.906389000  |

|   |              |              |              |
|---|--------------|--------------|--------------|
| H | -6.266132000 | 13.762916000 | 3.718304000  |
| H | -5.874647000 | 16.051017000 | 3.622024000  |
| H | -3.993816000 | 16.961201000 | 4.644510000  |
| H | 0.908528000  | 15.146251000 | 1.665631000  |
| H | 1.203645000  | 17.325996000 | 0.912727000  |
| H | 3.100714000  | 18.521516000 | 1.500030000  |
| H | 4.687927000  | 17.557154000 | 2.890302000  |
| H | 4.394198000  | 15.375603000 | 3.666313000  |
| H | 2.382941000  | 12.717289000 | 5.821042000  |
| H | 4.114659000  | 11.776404000 | 7.053416000  |
| H | 6.212821000  | 11.507322000 | 6.127210000  |
| H | 6.587136000  | 12.133976000 | 3.918564000  |
| H | 4.867257000  | 13.080279000 | 2.668860000  |
| H | 2.969015000  | 13.540788000 | 0.621964000  |
| H | 2.568152000  | 11.877536000 | -0.978197000 |
| H | 1.339238000  | 9.986738000  | -0.423629000 |
| H | 0.562194000  | 9.705014000  | 1.736877000  |
| H | 1.006853000  | 11.312283000 | 3.346666000  |
| H | -0.143526000 | 13.125427000 | 7.627240000  |
| H | 1.435155000  | 13.948926000 | 9.113791000  |
| H | 2.838488000  | 12.475295000 | 10.272993000 |
| H | 2.622095000  | 10.196224000 | 9.943718000  |
| H | 1.044609000  | 9.361889000  | 8.443688000  |
| H | -1.763676000 | 11.496487000 | 9.321754000  |
| H | -3.959128000 | 11.668049000 | 10.086211000 |
| H | -5.725417000 | 11.028753000 | 8.759484000  |
| H | -5.321011000 | 10.219701000 | 6.618234000  |

|                     |              |              |              |
|---------------------|--------------|--------------|--------------|
| H                   | -3.146871000 | 10.060780000 | 5.822967000  |
| H                   | 0.506409000  | 9.529840000  | 4.808184000  |
| H                   | 0.831852000  | 7.294111000  | 4.236286000  |
| H                   | 0.077719000  | 5.603770000  | 5.615004000  |
| H                   | -1.078975000 | 6.131098000  | 7.544440000  |
| H                   | -1.489782000 | 8.341544000  | 8.091306000  |
| H                   | -2.453370000 | 15.081238000 | 2.609167000  |
| H                   | -1.923605000 | 16.737267000 | 1.068699000  |
| H                   | -1.053944000 | 16.170208000 | -0.993602000 |
| H                   | -0.666987000 | 13.936285000 | -1.503881000 |
| H                   | -1.161382000 | 12.267615000 | 0.025033000  |
| H                   | -3.913447000 | 12.023815000 | 0.714392000  |
| H                   | -1.742882000 | 10.219701000 | 3.602769000  |
| H                   | -2.912547000 | 8.256666000  | 3.256163000  |
| H                   | -4.557425000 | 8.160952000  | 1.625193000  |
| H                   | -5.066440000 | 10.035497000 | 0.392819000  |
| H                   | 1.416259000  | 18.272299000 | 6.381387000  |
| H                   | 2.313300000  | 18.104348000 | 5.056585000  |
| H                   | 3.704903000  | 15.204040000 | 6.425675000  |
| H                   | 2.966385000  | 15.646491000 | 7.783212000  |
| H                   | 4.571447000  | 17.125539000 | 7.944961000  |
| H                   | 4.940117000  | 17.011766000 | 6.381387000  |
| H                   | 3.944872000  | 18.898953000 | 6.236968000  |
| H                   | 3.146430000  | 18.680436000 | 7.611835000  |
| <b>7Dy (LAJJUE)</b> |              |              |              |
| Dy                  | -8.134438000 | 7.566128000  | 14.849607000 |
| N                   | -8.444458000 | 5.356593000  | 14.437406000 |
| N                   | -7.897398000 | 8.955329000  | 13.065295000 |

|    |               |              |              |
|----|---------------|--------------|--------------|
| N  | -9.208587000  | 8.364587000  | 16.677009000 |
| Cl | -5.676667000  | 7.531641000  | 15.699333000 |
| Li | -3.440445000  | 7.582253000  | 16.512583000 |
| Si | -7.646832000  | 4.230990000  | 15.467057000 |
| Si | -9.370050000  | 4.874420000  | 13.104039000 |
| Si | -6.441215000  | 8.870710000  | 12.177581000 |
| Si | -9.068654000  | 10.141603000 | 12.699966000 |
| Si | -8.403686000  | 9.592373000  | 17.544123000 |
| Si | -10.689492000 | 7.717964000  | 17.251179000 |
| O  | -2.254624000  | 7.183103000  | 15.146141000 |
| O  | -3.006237000  | 9.341707000  | 17.223208000 |
| O  | -3.195376000  | 6.373627000  | 17.911153000 |
| C  | -5.879569000  | 3.838226000  | 14.932576000 |
| C  | -7.632053000  | 4.860050000  | 17.238327000 |
| C  | -8.436453000  | 2.544980000  | 15.577052000 |
| C  | -8.401303000  | 3.954778000  | 11.816032000 |
| C  | -10.094995000 | 6.381610000  | 12.263952000 |
| C  | -10.872993000 | 3.803101000  | 13.494316000 |
| C  | -5.064359000  | 9.852619000  | 12.921658000 |
| C  | -5.841495000  | 7.200666000  | 12.073066000 |
| C  | -6.594440000  | 9.405571000  | 10.400451000 |
| C  | -10.496034000 | 10.088915000 | 13.925227000 |
| C  | -8.401970000  | 11.888284000 | 12.808261000 |
| C  | -9.839147000  | 9.940432000  | 10.990119000 |
| C  | -7.386231000  | 10.652515000 | 16.401075000 |
| C  | -9.519946000  | 10.764277000 | 18.425223000 |
| C  | -7.239010000  | 8.936170000  | 18.882593000 |

|   |               |              |              |
|---|---------------|--------------|--------------|
| C | -12.082041000 | 8.982472000  | 17.274237000 |
| C | -10.605309000 | 6.980335000  | 18.961971000 |
| C | -11.281670000 | 6.311360000  | 16.176170000 |
| C | -1.199286000  | 7.845692000  | 14.564034000 |
| C | -0.698315000  | 7.162348000  | 13.333670000 |
| C | -1.582022000  | 6.209177000  | 13.019936000 |
| C | -2.457518000  | 6.130944000  | 14.337238000 |
| C | -3.354125000  | 10.559912000 | 16.826316000 |
| C | -2.897608000  | 11.594509000 | 17.446223000 |
| C | -2.461680000  | 11.029313000 | 18.621778000 |
| C | -2.916554000  | 9.657833000  | 18.421443000 |
| C | -3.847079000  | 6.258672000  | 19.018670000 |
| C | -3.569542000  | 4.963829000  | 19.691496000 |
| C | -2.472114000  | 4.443338000  | 19.186877000 |
| C | -2.563663000  | 5.184160000  | 17.899814000 |
| H | -5.894086000  | 3.372019000  | 14.093434000 |
| H | -5.460412000  | 3.288996000  | 15.597842000 |
| H | -5.386203000  | 4.655686000  | 14.834298000 |
| H | -6.944472000  | 5.522639000  | 17.334715000 |
| H | -7.458216000  | 4.130404000  | 17.835555000 |
| H | -8.483060000  | 5.251217000  | 17.446223000 |
| H | -9.262508000  | 2.608844000  | 16.058992000 |
| H | -7.843881000  | 1.943062000  | 16.034423000 |
| H | -8.606565000  | 2.212888000  | 14.690661000 |
| H | -7.907429000  | 4.579049000  | 11.279283000 |
| H | -9.002470000  | 3.458236000  | 11.256603000 |
| H | -7.790529000  | 3.349667000  | 12.245052000 |

|   |               |              |              |
|---|---------------|--------------|--------------|
| H | -10.695765000 | 6.827062000  | 12.864959000 |
| H | -10.571293000 | 6.110188000  | 11.475839000 |
| H | -9.385685000  | 6.981932000  | 12.018257000 |
| H | -10.733500000 | 2.918585000  | 13.150343000 |
| H | -11.654381000 | 4.186285000  | 13.084195000 |
| H | -11.000700000 | 3.761590000  | 14.444966000 |
| H | -5.330957000  | 10.770664000 | 13.001037000 |
| H | -4.286169000  | 9.791948000  | 12.360340000 |
| H | -4.858084000  | 9.504560000  | 13.792930000 |
| H | -5.718337000  | 6.849414000  | 12.957568000 |
| H | -5.004967000  | 7.189490000  | 11.604356000 |
| H | -6.476520000  | 6.661015000  | 11.600576000 |
| H | -7.231298000  | 8.846761000  | 9.950641000  |
| H | -5.738041000  | 9.327337000  | 9.967650000  |
| H | -6.887593000  | 10.318826000 | 10.364542000 |
| H | -10.926625000 | 9.231541000  | 13.879868000 |
| H | -11.126418000 | 10.777050000 | 13.707882000 |
| H | -10.159172000 | 10.231013000 | 14.813508000 |
| H | -8.074626000  | 12.051137000 | 13.694652000 |
| H | -9.103921000  | 12.510958000 | 12.607925000 |
| H | -7.687695000  | 11.998449000 | 12.177014000 |
| H | -9.169553000  | 10.088915000 | 10.317293000 |
| H | -10.548432000 | 10.579072000 | 10.880501000 |
| H | -10.191198000 | 9.052722000  | 10.899401000 |
| H | -6.655568000  | 10.136813000 | 16.053322000 |
| H | -7.042252000  | 11.407707000 | 16.884905000 |
| H | -7.934021000  | 10.960659000 | 15.675330000 |

|   |               |              |              |
|---|---------------|--------------|--------------|
| H | -10.210399000 | 11.059648000 | 17.827995000 |
| H | -9.011554000  | 11.522662000 | 18.727616000 |
| H | -9.918771000  | 10.323616000 | 19.179317000 |
| H | -7.516533000  | 8.054847000  | 19.143407000 |
| H | -7.268295000  | 9.518929000  | 19.646137000 |
| H | -6.345023000  | 8.902642000  | 18.540510000 |
| H | -11.832772000 | 9.721697000  | 17.833665000 |
| H | -12.880408000 | 8.573742000  | 17.618209000 |
| H | -12.243272000 | 9.297002000  | 16.382175000 |
| H | -9.933612000  | 6.293797000  | 18.980871000 |
| H | -11.458467000 | 6.600344000  | 19.188766000 |
| H | -10.381653000 | 7.665277000  | 19.595108000 |
| H | -11.321273000 | 6.600344000  | 15.261429000 |
| H | -12.157971000 | 6.036745000  | 16.461554000 |
| H | -10.674297000 | 5.570537000  | 16.253658000 |
| H | -0.475064000  | 7.911153000  | 15.206620000 |
| H | -1.474983000  | 8.746175000  | 14.335349000 |
| H | -0.617498000  | 7.799391000  | 12.604145000 |
| H | 0.174689000   | 6.772777000  | 13.498096000 |
| H | -1.138870000  | 5.364576000  | 12.836610000 |
| H | -2.118338000  | 6.461440000  | 12.252612000 |
| H | -3.397105000  | 6.091029000  | 14.093434000 |
| H | -2.239427000  | 5.315081000  | 14.815398000 |
| H | -3.097544000  | 10.644532000 | 15.894566000 |
| H | -4.321171000  | 10.611004000 | 16.856556000 |
| H | -3.590066000  | 12.253905000 | 17.603090000 |
| H | -2.167493000  | 12.008029000 | 16.958613000 |



|   |              |              |              |
|---|--------------|--------------|--------------|
| H | -2.881376000 | 11.438042000 | 19.394772000 |
| H | -1.497710000 | 11.078807000 | 18.710607000 |
| H | -2.293912000 | 9.052722000  | 18.858023000 |
| H | -3.781394000 | 9.549265000  | 18.842904000 |
| H | -4.796228000 | 6.328922000  | 18.839124000 |
| H | -3.602432000 | 6.986722000  | 19.612118000 |
| H | -3.459371000 | 5.104330000  | 20.644036000 |
| H | -4.312717000 | 4.357121000  | 19.557309000 |
| H | -2.528619000 | 3.482185000  | 19.071589000 |
| H | -1.678706000 | 4.673248000  | 19.695276000 |
| H | -1.660915000 | 5.329451000  | 17.572850000 |
| H | -3.012572000 | 4.612577000  | 17.259117000 |

**1Er (LAJKAL)**

|    |              |              |             |
|----|--------------|--------------|-------------|
| Er | 0.523209000  | 15.687681000 | 5.381978000 |
| N  | 0.692039000  | 17.073229000 | 3.618739000 |
| N  | 0.199382000  | 13.504221000 | 4.963806000 |
| N  | -0.559476000 | 16.464161000 | 7.184950000 |
| Cl | 2.956769000  | 15.676563000 | 6.211887000 |
| Li | 5.142062000  | 15.779363000 | 7.055508000 |
| Si | -0.484974000 | 18.254949000 | 3.248235000 |
| Si | 2.166706000  | 17.008938000 | 2.711709000 |
| Si | -0.736085000 | 13.019707000 | 3.624742000 |
| Si | 1.004586000  | 12.374868000 | 5.987896000 |
| Si | -2.026466000 | 15.809977000 | 7.785634000 |
| Si | 0.235452000  | 17.721451000 | 8.046019000 |
| O  | 6.389429000  | 15.318534000 | 5.680425000 |
| O  | 5.578998000  | 17.514722000 | 7.749616000 |

|   |              |              |             |
|---|--------------|--------------|-------------|
| O | 5.416872000  | 14.504833000 | 8.475615000 |
| C | -1.928485000 | 18.147959000 | 4.451668000 |
| C | 0.140112000  | 20.010611000 | 3.371111000 |
| C | -1.259372000 | 18.128624000 | 1.553300000 |
| C | 3.510806000  | 18.033558000 | 3.427390000 |
| C | 2.027552000  | 17.550171000 | 0.937983000 |
| C | 2.807378000  | 15.278252000 | 2.613221000 |
| C | -1.505724000 | 14.524168000 | 2.806445000 |
| C | 0.252669000  | 12.123346000 | 2.326198000 |
| C | -2.214262000 | 11.904211000 | 4.003312000 |
| C | 1.060708000  | 13.011167000 | 7.770252000 |
| C | 2.741719000  | 11.975107000 | 5.445930000 |
| C | 0.131533000  | 10.703799000 | 6.102518000 |
| C | -2.640234000 | 14.393654000 | 6.730966000 |
| C | -1.884638000 | 15.112289000 | 9.520528000 |
| C | -3.467823000 | 17.008777000 | 7.757120000 |
| C | 1.255039000  | 18.786030000 | 6.909183000 |
| C | 1.415667000  | 17.063561000 | 9.355443000 |
| C | -0.926512000 | 18.910099000 | 8.903335000 |
| C | 6.182751000  | 14.211578000 | 4.772458000 |
| C | 6.958201000  | 14.340481000 | 3.545576000 |
| C | 7.884878000  | 15.392653000 | 3.832599000 |
| C | 7.342639000  | 16.125790000 | 5.027589000 |
| C | 5.166629000  | 18.697409000 | 7.402562000 |
| C | 5.631744000  | 19.793086000 | 7.978484000 |
| C | 6.134410000  | 19.254915000 | 9.220373000 |
| C | 6.048792000  | 17.793475000 | 8.802033000 |

|   |              |              |              |
|---|--------------|--------------|--------------|
| C | 5.839886000  | 13.170684000 | 8.333041000  |
| C | 5.901414000  | 12.532614000 | 9.634962000  |
| C | 4.816865000  | 13.173907000 | 10.270914000 |
| C | 4.639966000  | 14.435547000 | 9.601194000  |
| H | -2.342419000 | 17.284308000 | 4.382257000  |
| H | -2.572284000 | 18.827924000 | 4.241559000  |
| H | -1.609369000 | 18.278474000 | 5.348379000  |
| H | 0.471221000  | 20.170128000 | 4.258443000  |
| H | -0.573241000 | 20.619678000 | 3.181638000  |
| H | 0.849827000  | 20.142736000 | 2.737035000  |
| H | -0.637744000 | 18.449271000 | 0.894836000  |
| H | -2.059200000 | 18.660349000 | 1.527036000  |
| H | -1.476511000 | 17.213411000 | 1.369455000  |
| H | 3.182870000  | 18.921378000 | 3.590599000  |
| H | 4.247755000  | 18.070617000 | 2.812073000  |
| H | 3.803789000  | 17.643625000 | 4.254691000  |
| H | 1.436170000  | 16.958827000 | 0.467116000  |
| H | 2.897452000  | 17.524390000 | 0.527146000  |
| H | 1.687721000  | 18.444437000 | 0.900464000  |
| H | 2.931619000  | 14.931824000 | 3.498677000  |
| H | 3.646795000  | 15.273418000 | 2.146105000  |
| H | 2.175753000  | 14.730413000 | 2.142353000  |
| H | -2.162794000 | 14.907655000 | 3.393623000  |
| H | -1.928097000 | 14.261528000 | 1.984772000  |
| H | -0.824863000 | 15.173518000 | 2.620725000  |
| H | 0.940492000  | 12.703410000 | 1.988524000  |
| H | -0.325564000 | 11.860706000 | 1.605827000  |

|   |              |              |              |
|---|--------------|--------------|--------------|
| H | 0.659302000  | 11.341870000 | 2.712647000  |
| H | -1.925687000 | 11.167851000 | 4.547342000  |
| H | -2.581757000 | 11.570673000 | 3.181638000  |
| H | -2.883396000 | 12.408544000 | 4.472303000  |
| H | 1.575822000  | 13.820034000 | 7.804019000  |
| H | 1.464320000  | 12.348927000 | 8.333041000  |
| H | 0.168743000  | 13.188409000 | 8.074158000  |
| H | 2.732275000  | 11.672185000 | 4.534210000  |
| H | 3.105088000  | 11.287086000 | 6.008719000  |
| H | 3.289025000  | 12.763028000 | 5.513464000  |
| H | -0.757833000 | 10.831091000 | 6.436440000  |
| H | 0.620224000  | 10.130180000 | 6.697199000  |
| H | 0.094404000  | 10.302588000 | 5.230193000  |
| H | -2.692238000 | 14.675629000 | 5.813619000  |
| H | -3.510573000 | 14.126179000 | 7.031121000  |
| H | -2.035734000 | 13.654071000 | 6.804129000  |
| H | -1.134405000 | 14.516112000 | 9.565551000  |
| H | -2.686963000 | 14.632124000 | 9.740016000  |
| H | -1.762857000 | 15.830924000 | 10.145225000 |
| H | -3.297464000 | 17.725801000 | 8.372437000  |
| H | -4.270883000 | 16.551171000 | 8.010375000  |
| H | -3.570113000 | 17.366484000 | 6.871664000  |
| H | 1.730243000  | 18.226912000 | 6.291990000  |
| H | 1.877921000  | 19.298420000 | 7.426950000  |
| H | 0.675325000  | 19.378985000 | 6.425184000  |
| H | 0.952540000  | 16.444826000 | 9.921985000  |
| H | 1.748510000  | 17.793475000 | 9.882589000  |

|   |              |              |              |
|---|--------------|--------------|--------------|
| H | 2.150570000  | 16.617234000 | 8.927723000  |
| H | -1.476945000 | 19.351593000 | 8.250499000  |
| H | -0.417976000 | 19.562672000 | 9.389210000  |
| H | -1.488178000 | 18.425101000 | 9.514900000  |
| H | 5.241314000  | 14.158405000 | 4.547342000  |
| H | 6.431618000  | 13.386597000 | 5.217062000  |
| H | 7.423253000  | 13.513889000 | 3.339220000  |
| H | 6.386678000  | 14.575729000 | 2.797065000  |
| H | 7.967251000  | 15.990442000 | 3.072832000  |
| H | 8.763513000  | 15.025279000 | 4.029575000  |
| H | 8.061448000  | 16.341703000 | 5.639154000  |
| H | 6.926486000  | 16.955605000 | 4.742442000  |
| H | 4.204883000  | 18.707077000 | 7.513244000  |
| H | 5.338528000  | 18.787641000 | 6.451447000  |
| H | 4.924341000  | 20.442436000 | 8.132313000  |
| H | 6.334581000  | 20.203965000 | 7.455089000  |
| H | 5.561473000  | 19.459549000 | 9.976388000  |
| H | 7.044997000  | 19.535280000 | 9.406094000  |
| H | 6.948741000  | 17.430935000 | 8.822669000  |
| H | 5.536876000  | 17.326201000 | 9.481133000  |
| H | 6.714787000  | 13.148126000 | 7.916577000  |
| H | 5.221439000  | 12.688909000 | 7.760872000  |
| H | 5.769835000  | 11.573896000 | 9.573055000  |
| H | 6.741616000  | 12.714689000 | 10.085194000 |
| H | 5.008175000  | 13.314089000 | 11.212649000 |
| H | 4.012814000  | 12.635736000 | 10.195876000 |
| H | 3.707879000  | 14.545115000 | 9.357319000  |

|                     |              |              |              |
|---------------------|--------------|--------------|--------------|
| H                   | 4.880528000  | 15.157405000 | 10.203380000 |
| <b>2Er (FOXWUM)</b> |              |              |              |
| Er                  | 8.687600000  | 4.216261000  | 12.592861000 |
| N                   | 7.557968000  | 3.351504000  | 10.874058000 |
| N                   | 10.226856000 | 2.856324000  | 13.512799000 |
| N                   | 9.192415000  | 6.394896000  | 12.381264000 |
| Cl                  | 6.935919000  | 4.331489000  | 14.412597000 |
| Si                  | 7.680563000  | 3.915852000  | 9.261393000  |
| Si                  | 10.423238000 | 2.975482000  | 15.216666000 |
| Si                  | 6.370580000  | 2.180836000  | 11.280053000 |
| Si                  | 7.932506000  | 7.506300000  | 12.593992000 |
| Si                  | 11.047436000 | 1.639596000  | 12.639933000 |
| Si                  | 10.807796000 | 6.912084000  | 12.170572000 |
| C                   | 6.010040000  | 0.969924000  | 9.887359000  |
| C                   | 6.936764000  | 1.125552000  | 12.695831000 |
| C                   | 4.725617000  | 2.939640000  | 11.740815000 |
| C                   | 6.037155000  | 4.532076000  | 8.583830000  |
| C                   | 8.318140000  | 2.651964000  | 8.029377000  |
| C                   | 8.904880000  | 5.318076000  | 9.122441000  |
| C                   | 7.626799000  | 7.948032000  | 14.379556000 |
| C                   | 10.765930000 | -0.088032000 | 13.304597000 |
| C                   | 11.953341000 | 5.442264000  | 12.102906000 |
| C                   | 11.416083000 | 7.999908000  | 13.576165000 |
| C                   | 11.103395000 | 7.889868000  | 10.591174000 |
| C                   | 10.511577000 | 1.631736000  | 10.846901000 |
| C                   | 12.897335000 | 1.834524000  | 12.557783000 |
| C                   | 8.227338000  | 9.158472000  | 11.715921000 |

|   |              |              |              |
|---|--------------|--------------|--------------|
| C | 6.354775000  | 6.850776000  | 11.869810000 |
| C | 12.119799000 | 2.427168000  | 15.846026000 |
| C | 10.276845000 | 4.725432000  | 15.787186000 |
| C | 9.171219000  | 1.949280000  | 16.149278000 |
| H | 5.712703000  | 1.452528000  | 9.113389000  |
| H | 5.326789000  | 0.356844000  | 10.163454000 |
| H | 6.809592000  | 0.482604000  | 9.672367000  |
| H | 6.223983000  | 0.539196000  | 12.962873000 |
| H | 7.182298000  | 1.685184000  | 13.435855000 |
| H | 7.694144000  | 0.603648000  | 12.424262000 |
| H | 4.407300000  | 3.477264000  | 11.012106000 |
| H | 4.833024000  | 3.486696000  | 12.521574000 |
| H | 4.092001000  | 2.241672000  | 11.924123000 |
| H | 6.186603000  | 5.006820000  | 7.762335000  |
| H | 5.628280000  | 5.121576000  | 9.222016000  |
| H | 5.457443000  | 3.785376000  | 8.420889000  |
| H | 8.432063000  | 3.068544000  | 7.171673000  |
| H | 7.686003000  | 1.931988000  | 7.952433000  |
| H | 9.161053000  | 2.306124000  | 8.330366000  |
| H | 8.991978000  | 5.579028000  | 8.203634000  |
| H | 9.759089000  | 5.031972000  | 9.455112000  |
| H | 8.594706000  | 6.066348000  | 9.640684000  |
| H | 6.819362000  | 8.462076000  | 14.449711000 |
| H | 8.364001000  | 8.465220000  | 14.712227000 |
| H | 7.540317000  | 7.144740000  | 14.897799000 |
| H | 9.823947000  | -0.235800000 | 13.420014000 |
| H | 11.210027000 | -0.180780000 | 14.150986000 |

|   |              |              |              |
|---|--------------|--------------|--------------|
| H | 11.118578000 | -0.730980000 | 12.684515000 |
| H | 11.692876000 | 4.866912000  | 11.380986000 |
| H | 11.903042000 | 4.958088000  | 12.931190000 |
| H | 12.854125000 | 5.744088000  | 11.962596000 |
| H | 12.304876000 | 8.306448000  | 13.381541000 |
| H | 11.423871000 | 7.495296000  | 14.390871000 |
| H | 10.832240000 | 8.756040000  | 13.671214000 |
| H | 12.045808000 | 7.921308000  | 10.405602000 |
| H | 10.769471000 | 8.784336000  | 10.699802000 |
| H | 10.648214000 | 7.465428000  | 9.860202000  |
| H | 10.589945000 | 2.516772000  | 10.484810000 |
| H | 9.597801000  | 1.342488000  | 10.788061000 |
| H | 11.069296000 | 1.031232000  | 10.349026000 |
| H | 13.241210000 | 1.326768000  | 11.820022000 |
| H | 13.289769000 | 1.516980000  | 13.374752000 |
| H | 13.115695000 | 2.762004000  | 12.440104000 |
| H | 8.631268000  | 8.998128000  | 10.860480000 |
| H | 8.810625000  | 9.703956000  | 12.247743000 |
| H | 7.389049000  | 9.609636000  | 11.593715000 |
| H | 6.470431000  | 6.701436000  | 10.928372000 |
| H | 5.649222000  | 7.487436000  | 12.007857000 |
| H | 6.125348000  | 6.022332000  | 12.299793000 |
| H | 12.342150000 | 1.573572000  | 15.465830000 |
| H | 12.098407000 | 2.354856000  | 16.803305000 |
| H | 12.780445000 | 3.073260000  | 15.590299000 |
| H | 11.022095000 | 5.233188000  | 15.456778000 |
| H | 10.271869000 | 4.750584000  | 16.746728000 |



|   |             |             |              |
|---|-------------|-------------|--------------|
| H | 9.458770000 | 5.102712000 | 15.454515000 |
| H | 8.288247000 | 2.285688000 | 15.972758000 |
| H | 9.351523000 | 2.001156000 | 17.090715000 |
| H | 9.229439000 | 1.035948000 | 15.859604000 |
